# Supplementary material for: Study of the pH effects on water–oil–illite interfaces by molecular dynamics
Source: Royal Society of Chemistry journal article supplement (doi:10.1039/d4cp03985h), 2024-12-18
Supplement: d4cp03985h2.pdf [file d4cp03985h2.pdf]

**Supporting information 1 of:**

**Study of the pH effects on water-oil-illite interfaces by molecular dynamics**

**Authors**

Anderson Arboleda-Lamus<sup>a</sup>, Leonardo Muñoz-Rugeles<sup>a</sup>, Jorge M. del Campo<sup>b</sup>, Nicolas Santos-Santos<sup>c</sup> and Enrique Mejía-Ospino<sup>a</sup>

**Corresponding autor**

Enrique Mejia-Ospino

E-mail: [emejia@uis.edu.co](mailto:emejia@uis.edu.co)

Parameter to different systems simulated.

Table S1. Lennard-Jones and partial charge parameters of the illita (CLAYFF).

| Atom type | Description | $\epsilon \left( \frac{kJ}{mol * \text{\AA}^2} \right)$ | $\sigma(\text{\AA})$ | $q(e)$  |
|-----------|-------------|---------------------------------------------------------|----------------------|---------|
| Alo       |             | 1.3298e-06                                              | 4.2712               | 1.5750  |
| Alt       |             | 1.8405e-06                                              | 3.3020               | 1.5750  |
| H         |             | 0.0000e00                                               | 0.0000               | 0.4250  |
| K         |             | 1.0000e-01                                              | 3.3340               | 1.0000  |
| Mgo       |             | 9.0298e-07                                              | 5.2643               | 1.3600  |
| Ob        |             | 1.5540e-01                                              | 3.1655               | -1.0500 |
| Obos      |             | 1.5540e-01                                              | 3.1655               | -1.1808 |
| Obts      |             | 1.5540e-01                                              | 3.1655               | -1.1688 |
| Oeao      |             | 1.5540e-01                                              | 3.1655               | -1.1875 |
| Oeat      |             | 1.5540e-01                                              | 3.1655               | -1.0688 |
| Oest      |             | 1.5540e-01                                              | 3.1655               | -0.9500 |
| Oh        |             | 1.5540e-01                                              | 3.1655               | -0.9500 |
| Ohs       |             | 1.5540e-01                                              | 3.1655               | -1.0808 |
| Sit       |             | 1.8405e-06                                              | 3.3020               | 2.1000  |

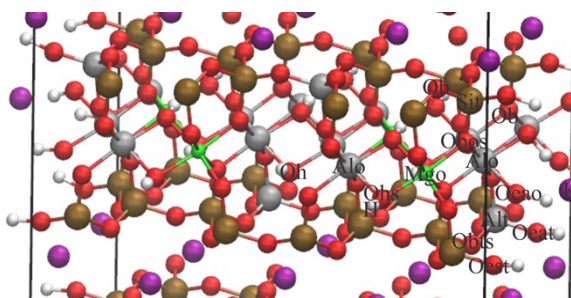

Table S2. Bond coefficients parameters of the illita (CLAYFF).

| Bond type | $k_{r,ij} \left( \frac{kJ}{mol * \text{\AA}^2} \right)$ | $r_{0,ij}(\text{\AA})$ |
|-----------|---------------------------------------------------------|------------------------|
| H-Oeao    | 554.1350                                                | 1.0000                 |
| H-Oeat    | 554.1350                                                | 1.0000                 |
| H-Oest    | 554.1350                                                | 1.0000                 |
| H-Oh      | 554.1350                                                | 1.0000                 |
| H-Ohs     | 554.1350                                                | 1.0000                 |

Table S3. Angle coefficients parameters of the illite (CLAYFF).

| Angle type | $k_{\theta,ijk} \left( \frac{kJ}{mol * rad^2} \right)$ | $\theta_{0,ijk}(deg)$ |
|------------|--------------------------------------------------------|-----------------------|
| Alo-Oeao-H | 30.0000                                                | 109.4700              |
| Alo-Oh-H   | 30.0000                                                | 109.4700              |
| Alo-Ohs-H  | 30.0000                                                | 109.4700              |
| Alt-Oeat-H | 30.0000                                                | 109.4700              |
| H-Oest-Sit | 30.0000                                                | 109.4700              |
| H-O-Mgo    | 30.0000                                                | 109.4700              |

Table S4. Lennard-Jones and partial charge parameters of the water (CLAYFF).

| Atom type | Description                                                                       | $\epsilon \left( \frac{kJ}{mol * \text{\AA}^2} \right)$ | $\sigma(\text{\AA})$ | $q(e)$ |
|-----------|-----------------------------------------------------------------------------------|---------------------------------------------------------|----------------------|--------|
| Hw        | 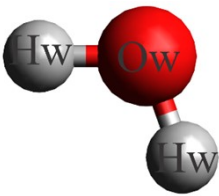 | 0.0000e-4                                               | 4.2712               | 1.5750 |
| Ow        |                                                                                   | 1.8405e-06                                              | 3.3020               | 1.5750 |

Table S5. Water's bond coefficients parameters (CLAYFF).

| Bond type | $k_{r,ij} \left( \frac{kJ}{mol * \text{\AA}^2} \right)$ | $r_{0,ij}(\text{\AA})$ |
|-----------|---------------------------------------------------------|------------------------|
| Hw-Ow     | 554.1349                                                | 1.0000                 |

Table S6. Water's angle coefficients parameters (CLAYFF).

| Angle type | $k_{\theta,ijk} \left( \frac{kJ}{mol * rad^2} \right)$ | $\theta_{0,ijk}(deg)$ |
|------------|--------------------------------------------------------|-----------------------|
| Hw-O2-Hw   | 45.7695                                                | 109.4700              |

Table S7. Lennard-Jones and partial charge parameters of the toluene (CGENFF).

| Atom type | Description                                                                       | $\epsilon\left(\frac{kJ}{mol * \text{\AA}^2}\right)$ | $\sigma(\text{\AA})$ | $q(e)$  |
|-----------|-----------------------------------------------------------------------------------|------------------------------------------------------|----------------------|---------|
| C10       | 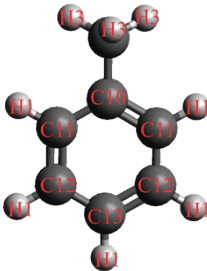 | 7.0000e-02                                           | 3.5501               | -0.0100 |
| C11       |                                                                                   | 7.0000e-02                                           | 3.5501               | -0.1160 |
| C12       |                                                                                   | 7.0000e-02                                           | 3.5501               | -0.1140 |
| C13       |                                                                                   | 7.0000e-02                                           | 3.5501               | -0.1150 |
| C3        |                                                                                   | 7.8000e-02                                           | 3.6527               | -0.2690 |
| H1        |                                                                                   | 3.0000e-02                                           | 2.4200               | 0.1150  |
| H3        |                                                                                   | 2.4000e-02                                           | 2.3876               | 0.0900  |

Table S8. Bond coefficients parameters of the toluene (CGENFF).

| Bond type | $k_{r,ij}\left(\frac{kJ}{mol * \text{\AA}^2}\right)$ | $r_{0,ij}(\text{\AA})$ |
|-----------|------------------------------------------------------|------------------------|
| C10-C11   | 305.0000                                             | 1.3750                 |
| C10-C3    | 230.0000                                             | 1.4900                 |
| C11-C12   | 305.0000                                             | 1.3750                 |
| C11-H1    | 340.0000                                             | 1.0800                 |
| C12-C13   | 305.0000                                             | 1.3750                 |
| C12-H1    | 340.0000                                             | 1.0800                 |
| C13-H1    | 340.0000                                             | 1.0800                 |
| C3-H3     | 322.0000                                             | 1.1110                 |

Table S9. Angle coefficients parameters of the toluene (CGENFF).

| Angle type  | $k_{\theta,ijk}\left(\frac{kJ}{mol * rad^2}\right)$ | $\theta_{0,ijk}(deg)$ | $k_{UB,ik}\left(\frac{kJ}{mol * \text{\AA}^2}\right)$ | $r_{0,ik}(\text{\AA})$ |
|-------------|-----------------------------------------------------|-----------------------|-------------------------------------------------------|------------------------|
| C10-C11-C12 | 40.0000                                             | 120.0000              | 35.0000                                               | 2.4162                 |
| C10-C11-H1  | 30.0000                                             | 120.0000              | 22.0000                                               | 2.1525                 |
| C10-C3-H3   | 49.3000                                             | 107.5000              | 0.0000                                                | 0.0000                 |
| C11-C10-C11 | 40.0000                                             | 120.0000              | 35.0000                                               | 2.4162                 |
| C11-C10-C3  | 45.8000                                             | 120.0000              | 0.0000                                                | 0.0000                 |
| C11-C12-C13 | 40.0000                                             | 120.0000              | 35.0000                                               | 2.4162                 |
| C11-C12-H1  | 30.0000                                             | 120.0000              | 22.0000                                               | 2.1525                 |
| C12-C11-H1  | 30.0000                                             | 120.0000              | 22.0000                                               | 2.1525                 |
| C12-C13-C12 | 40.0000                                             | 120.0000              | 35.0000                                               | 2.4162                 |
| C12-C13-H1  | 30.0000                                             | 120.0000              | 22.0000                                               | 2.1525                 |
| C13-C12-H1  | 30.0000                                             | 120.0000              | 22.0000                                               | 2.1525                 |
| H3-C3-H3    | 35.5000                                             | 108.4000              | 5.4000                                                | 1.8020                 |



Table S10. Dihedral proper coefficients parameters of the toluene (CGENFF).

| Dihedral proper type | $k_{\phi,ijkl} \left( \frac{kJ}{mol} \right)$ | $n(adi.)$ | $\delta_{0,ijkl}(deg)$ | <i>Factorweight</i><br>( <i>adi.</i> ) |
|----------------------|-----------------------------------------------|-----------|------------------------|----------------------------------------|
| C10-C11-C12-C13      | 3.1000                                        | 2.0000    | 180.0000               | 0.5000                                 |
| C10-C11-C12-H1       | 4.2000                                        | 2.0000    | 180.0000               | 1.0000                                 |
| C11-C10-C11-C12      | 3.1000                                        | 2.0000    | 180.0000               | 1.0000                                 |
| C11-C10-C11-H1       | 4.2000                                        | 2.0000    | 180.0000               | 1.0000                                 |
| C11-C10-C3-H3        | 0.0020                                        | 6.0000    | 0.0000                 | 1.0000                                 |
| C11-C12-C13-C12      | 3.1000                                        | 2.0000    | 180.0000               | 1.0000                                 |
| C11-C12-C13-H1       | 4.2000                                        | 2.0000    | 180.0000               | 1.0000                                 |
| C3-C10-C11-C12       | 3.1000                                        | 2.0000    | 180.0000               | 1.0000                                 |
| C3-C10-C11-H1        | 2.4000                                        | 2.0000    | 180.0000               | 1.0000                                 |
| H1-C11-C12-C13       | 4.2000                                        | 2.0000    | 180.0000               | 1.0000                                 |
| H1-C11-C12-H1        | 2.4000                                        | 2.0000    | 180.0000               | 1.0000                                 |
| H1-C12-C13-C12       | 4.2000                                        | 2.0000    | 180.0000               | 1.0000                                 |
| H1-C12-C13-H1        | 2.4000                                        | 2.0000    | 180.0000               | 1.0000                                 |

Table S11. Lennard-Jones and partial charge parameters of the heptane (CGENFF).

| Atom type | Description                                                                       | $\epsilon\left(\frac{kJ}{mol * \text{\AA}^2}\right)$ | $\sigma(\text{\AA})$ | $q(e)$  |
|-----------|-----------------------------------------------------------------------------------|------------------------------------------------------|----------------------|---------|
| C2        | 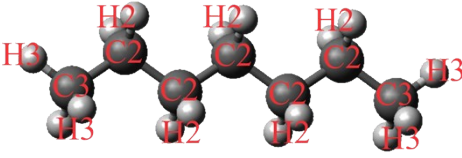 | 5.6000e-02                                           | 3.5814               | -0.1800 |
| C3        |                                                                                   | 7.8000e-02                                           | 3.6527               | -0.2700 |
| H2        |                                                                                   | 3.5000e-02                                           | 2.3876               | 0.0900  |
| H3        |                                                                                   | 2.4000e-02                                           | 2.3876               | 0.0900  |

Table S12. Bond coefficients parameters of the heptane (CGENFF).

| Bond type | $k_{r,ij}\left(\frac{kJ}{mol * \text{\AA}^2}\right)$ | $r_{0,ij}(\text{\AA})$ |
|-----------|------------------------------------------------------|------------------------|
| C2-C2     | 222.5000                                             | 1.5300                 |
| C2-C3     | 222.5000                                             | 1.5280                 |
| C2-H2     | 309.0000                                             | 1.1110                 |
| C3-H3     | 322.0000                                             | 1.1110                 |

Table S13. Angle coefficients parameters of the heptane (CGENFF).

| Angle type | $k_{\theta,ijk}\left(\frac{kJ}{mol * rad^2}\right)$ | $\theta_{0,ijk}(deg)$ | $k_{UB,ik}\left(\frac{kJ}{mol * \text{\AA}^2}\right)$ | $r_{0,ik}(\text{\AA})$ |
|------------|-----------------------------------------------------|-----------------------|-------------------------------------------------------|------------------------|
| C2-C2-C2   | 58.3500                                             | 113.6000              | 11.1600                                               | 2.5610                 |
| C2-C2-C3   | 58.0000                                             | 115.0000              | 8.0000                                                | 2.5610                 |
| C2-C2-H2   | 26.5000                                             | 110.1000              | 22.5300                                               | 2.1790                 |
| C2-C3-H3   | 34.6000                                             | 110.1000              | 22.5300                                               | 2.1790                 |
| C3-C2-H2   | 34.6000                                             | 110.1000              | 22.5300                                               | 2.1790                 |
| H2-C2-H2   | 35.5000                                             | 109.0000              | 5.4000                                                | 1.8020                 |
| H3-C3-H3   | 35.5000                                             | 108.4000              | 5.4000                                                | 1.8020                 |

Table S14. Dihedral proper coefficients parameters of the heptane (CGENFF).

| Dihedral proper type | $k_{\varphi,ijkl}\left(\frac{kJ}{mol}\right)$ | $n(adi.)$ | $\delta_{0,ijkl}(deg)$ | <i>Factorweight</i><br>(adi.) |
|----------------------|-----------------------------------------------|-----------|------------------------|-------------------------------|
| C2-C2-C2-C2          | 0.1497                                        | 3.0000    | 180.0000               | 1.0000                        |
| C2-C2-C2-C3          | 0.0813                                        | 3.0000    | 180.0000               | 1.0000                        |
| C2-C2-C2-H2          | 0.1950                                        | 3.0000    | 0.0000                 | 1.0000                        |
| C2-C2-C3-H3          | 0.1600                                        | 3.0000    | 0.0000                 | 1.0000                        |
| C3-C2-C2-H2          | 0.1800                                        | 3.0000    | 0.0000                 | 1.0000                        |
| H2-C2-C2-H2          | 0.2200                                        | 3.0000    | 0.0000                 | 1.0000                        |
| H2-C2-C3-H3          | 0.1600                                        | 3.0000    | 0.0000                 | 1.0000                        |

Table S15. Lennard-Jones and partial charge parameters of the heptanoic acid (CGENFF).

| Atom type | Description | $\epsilon \left( \frac{kJ}{mol * \text{\AA}^2} \right)$ | $\sigma(\text{\AA})$ | $q(e)$  |
|-----------|-------------|---------------------------------------------------------|----------------------|---------|
| C11       |             | 9.8000e-02                                              | 3.0291               | 0.8020  |
| C21       |             | 5.6000e-02                                              | 3.5814               | -0.1800 |
| C22       |             | 5.6000e-02                                              | 3.5814               | -0.2030 |
| C31       |             | 7.8000e-02                                              | 3.6527               | -0.2700 |
| H11       |             | 4.6000e-02                                              | 0.4000               | 0.4290  |
| H21       |             | 3.5000e-02                                              | 2.3876               | 0.0900  |
| H31       |             | 2.4000e-02                                              | 2.3876               | 0.0900  |
| O11       |             | 1.9210e-01                                              | 3.1449               | -0.6320 |
| O21       |             | 1.2000e-01                                              | 3.0291               | -0.5760 |

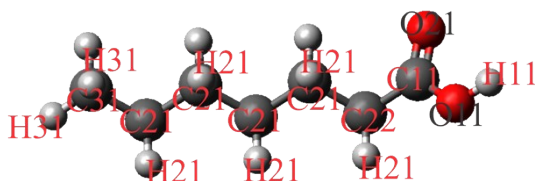

Table S16. Bond parameters of the heptanoic acid (CGENFF).

| Bond type | $k_{r,ij} \left( \frac{kJ}{mol * \text{\AA}^2} \right)$ | $r_{0,ij}(\text{\AA})$ |
|-----------|---------------------------------------------------------|------------------------|
| C11-C22   | 200.0000                                                | 1.5220                 |
| C11-O11   | 230.0000                                                | 1.4000                 |
| C11-O21   | 750.0000                                                | 1.2200                 |
| C21-C21   | 222.5000                                                | 1.5300                 |
| C21-C22   | 222.5000                                                | 1.5300                 |
| C21-C31   | 222.5000                                                | 1.5280                 |
| C21-H21   | 309.0000                                                | 1.1110                 |
| C22-H21   | 309.0000                                                | 1.1110                 |
| C31-H31   | 322.0000                                                | 1.1110                 |
| H11-O11   | 545.0000                                                | 0.9600                 |

Table S17. Angle parameters of the heptanoic acid (CGENFF).

| Angle type  | $k_{\theta,ijk} \left( \frac{kJ}{mol * rad^2} \right)$ | $\theta_{0,ijk}(deg)$ | $k_{UB,ik} \left( \frac{kJ}{mol * \text{\AA}^2} \right)$ | $r_{0,ik}(\text{\AA})$ |
|-------------|--------------------------------------------------------|-----------------------|----------------------------------------------------------|------------------------|
| C11-C22-C21 | 52.0000                                                | 108.0000              | 0.0000                                                   | 0.0000                 |
| C11-C22-H21 | 33.0000                                                | 109.5000              | 30.0000                                                  | 2.1630                 |
| C11-O11-H11 | 55.0000                                                | 115.0000              | 0.0000                                                   | 0.0000                 |
| C21-C21-C21 | 58.3500                                                | 113.6000              | 11.1600                                                  | 2.5610                 |
| C21-C21-C22 | 58.3500                                                | 113.6000              | 11.1600                                                  | 2.5610                 |
| C21-C21-C31 | 58.0000                                                | 115.0000              | 8.0000                                                   | 2.5610                 |
| C21-C21-H21 | 26.5000                                                | 110.1000              | 22.5300                                                  | 2.1790                 |
| C21-C22-H21 | 26.5000                                                | 110.1000              | 22.5300                                                  | 2.1790                 |
| C21-C31-H31 | 34.6000                                                | 110.1000              | 22.5300                                                  | 2.1790                 |
| C22-C11-O11 | 55.0000                                                | 110.5000              | 0.0000                                                   | 0.0000                 |
| C22-C11-O21 | 70.0000                                                | 125.0000              | 20.0000                                                  | 2.4420                 |
| C22-C21-H21 | 26.5000                                                | 110.1000              | 22.5300                                                  | 2.1790                 |

|             |         |          |          |        |
|-------------|---------|----------|----------|--------|
| C31-C21-H21 | 34.6000 | 110.1000 | 22.5300  | 2.1790 |
| H21-C21-H21 | 35.5000 | 109.0000 | 5.4000   | 1.8020 |
| H21-C22-H21 | 35.5000 | 109.0000 | 5.4000   | 1.8020 |
| H31-C31-H31 | 35.5000 | 108.4000 | 5.4000   | 1.8020 |
| O11-C11-O21 | 50.0000 | 123.0000 | 210.0000 | 2.2620 |

Table S18. Dihedral proper parameters of the heptanoic acid (CGENFF).

| Dihedral proper type | $k_{\phi,ijkl} \left( \frac{kJ}{mol} \right)$ | $n(adi.)$ | $\delta_{0,ijkl}(deg)$ | Factorweight<br>(adi.) |
|----------------------|-----------------------------------------------|-----------|------------------------|------------------------|
| C21-C21-C21-C21      | 0.1497                                        | 3.0000    | 180.0000               | 1.0000                 |
| C21-C21-C21-C22      | 0.1497                                        | 3.0000    | 180.0000               | 1.0000                 |
| C21-C21-C21-C31      | 0.0813                                        | 3.0000    | 180.0000               | 1.0000                 |
| C21-C21-C21-H21      | 0.1950                                        | 3.0000    | 0.0000                 | 1.0000                 |
| C21-C21-C22-C11      | 0.3500                                        | 3.0000    | 180.0000               | 1.0000                 |
| C21-C21-C22-H21      | 0.1950                                        | 3.0000    | 0.0000                 | 1.0000                 |
| C21-C21-C31-H31      | 0.1600                                        | 3.0000    | 0.0000                 | 1.0000                 |
| C22-C11-O11-H11      | 2.0500                                        | 2.0000    | 180.0000               | 1.0000                 |
| C22-C21-C21-H21      | 0.1950                                        | 3.0000    | 0.0000                 | 1.0000                 |
| C31-C21-C21-H21      | 0.1800                                        | 3.0000    | 0.0000                 | 1.0000                 |
| H21-C21-C21-H21      | 0.2200                                        | 3.0000    | 0.0000                 | 1.0000                 |
| H21-C21-C22-C11      | 0.1950                                        | 3.0000    | 0.0000                 | 1.0000                 |
| H21-C21-C22-H21      | 0.2200                                        | 3.0000    | 0.0000                 | 1.0000                 |
| H21-C21-C31-H31      | 0.1600                                        | 3.0000    | 0.0000                 | 1.0000                 |
| O11-C11-C22-C21      | 0.0000                                        | 6.0000    | 180.0000               | 1.0000                 |
| O11-C11-C22-H21      | 0.0000                                        | 6.0000    | 180.0000               | 1.0000                 |
| O21-C11-C22-C21      | 0.0500                                        | 6.0000    | 180.0000               | 1.0000                 |
| O21-C11-C22-H21      | 0.0000                                        | 6.0000    | 180.0000               | 1.0000                 |
| O21-C11-O11-H11      | 2.0500                                        | 2.0000    | 180.0000               | 1.0000                 |

Table S19. Dihedral improper coefficients parameters of the heptanoic acid (CGENFF).

| Dihedral improper type | $k_{\phi,ijk} \left( \frac{kJ}{mol * \text{\AA}^2} \right)$ | $\phi_{0,ijkl}(\text{\AA}^2)$ |
|------------------------|-------------------------------------------------------------|-------------------------------|
| C22-O11-C11-O21        | 65.0000                                                     | 180.0000                      |

Table S20. Lennard-Jones and partial charge parameters of the sodium heptanoate (CGENFF).

| Atom type | Description | $\epsilon\left(\frac{kJ}{mol * \text{\AA}^2}\right)$ | $\sigma(\text{\AA})$ | $q(e)$  |
|-----------|-------------|------------------------------------------------------|----------------------|---------|
| C11       |             | 7.0000e-02                                           | 3.5636               | 0.6220  |
| C21       |             | 5.6000e-02                                           | 3.5814               | -0.1800 |
| C22       |             | 5.6000e-02                                           | 3.5814               | -0.1790 |
| C23       |             | 5.6000e-02                                           | 3.5814               | -0.2830 |
| C31       |             | 7.8000e-02                                           | 3.6527               | -0.2700 |
| H21       |             | 3.5000e-02                                           | 2.3876               | 0.0900  |
| H31       |             | 2.4000e-02                                           | 2.3876               | 0.0900  |
| O21       |             | 1.2000e-01                                           | 3.0291               | -0.7600 |
| Na        |             | 4.6900e-02                                           | 2.5137               | 1.0000  |

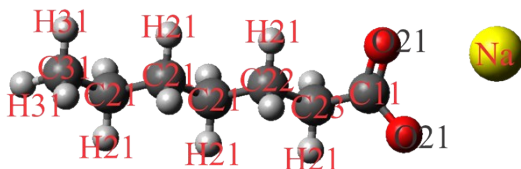

Table S21. Bond coefficients parameters of the sodium heptanoate (CGENFF).

| Bond type | $k_{r,ij}\left(\frac{kJ}{mol * \text{\AA}^2}\right)$ | $r_{0,ij}(\text{\AA})$ |
|-----------|------------------------------------------------------|------------------------|
| C11-C23   | 200.0000                                             | 1.5220                 |
| C11-O21   | 525.0000                                             | 1.2600                 |
| C21-C21   | 222.5000                                             | 1.5300                 |
| C21-C22   | 222.5000                                             | 1.5300                 |
| C21-C31   | 222.5000                                             | 1.5280                 |
| C21-H21   | 309.0000                                             | 1.1110                 |
| C22-C23   | 222.5000                                             | 1.5300                 |
| C22-H21   | 309.0000                                             | 1.1110                 |
| C23-H21   | 309.0000                                             | 1.1110                 |
| C31-H31   | 322.0000                                             | 1.1110                 |

Table S22. Angle coefficients parameters of the sodium heptanoate (CGENFF).

| Angle type  | $k_{\theta,ijk}\left(\frac{kJ}{mol * rad^2}\right)$ | $\theta_{0,ijk}(deg)$ | $k_{UB,ik}\left(\frac{kJ}{mol * \text{\AA}^2}\right)$ | $r_{0,ik}(\text{\AA})$ |
|-------------|-----------------------------------------------------|-----------------------|-------------------------------------------------------|------------------------|
| C11-C23-C22 | 52.0000                                             | 108.0000              | 0.0000                                                | 0.0000                 |
| C11-C23-H21 | 33.0000                                             | 109.5000              | 30.0000                                               | 2.1630                 |
| C21-C21-C21 | 58.3500                                             | 113.6000              | 11.1600                                               | 2.5610                 |
| C21-C21-C22 | 58.3500                                             | 113.6000              | 11.1600                                               | 2.5610                 |
| C21-C21-C31 | 58.0000                                             | 115.0000              | 8.0000                                                | 2.5610                 |
| C21-C21-H21 | 26.5000                                             | 110.1000              | 22.5300                                               | 2.1790                 |
| C21-C22-C23 | 58.3500                                             | 113.6000              | 11.1600                                               | 2.5610                 |
| C21-C22-H21 | 26.5000                                             | 110.1000              | 22.5300                                               | 2.1790                 |
| C21-C31-H31 | 34.6000                                             | 110.1000              | 22.5300                                               | 2.1790                 |
| C22-C21-H21 | 26.5000                                             | 110.1000              | 22.5300                                               | 2.1790                 |
| C22-C23-H21 | 26.5000                                             | 110.1000              | 22.5300                                               | 2.1790                 |
| C23-C11-O21 | 40.0000                                             | 116.0000              | 50.0000                                               | 2.3530                 |

|             |          |          |         |        |
|-------------|----------|----------|---------|--------|
| C23-C22-H21 | 26.5000  | 110.1000 | 22.5300 | 2.1790 |
| C31-C21-H21 | 34.6000  | 110.1000 | 22.5300 | 2.1790 |
| H21-C21-H21 | 35.5000  | 109.0000 | 5.4000  | 1.8020 |
| H21-C22-H21 | 35.5000  | 109.0000 | 5.4000  | 1.8020 |
| H21-C23-H21 | 35.5000  | 109.0000 | 5.4000  | 1.8020 |
| H31-C31-H31 | 35.5000  | 108.4000 | 5.4000  | 1.8020 |
| O21-C11-O21 | 100.0000 | 128.0000 | 70.0000 | 2.2587 |

Table S23. Dihedral proper coefficients parameters of the sodium heptanoate (CGENFF).

| Dihedral proper type | $k_{\phi,ijkl} \left( \frac{kJ}{mol} \right)$ | $n(adi.)$ | $\delta_{0,ijkl}(deg)$ | Factorweight<br>(adi.) |
|----------------------|-----------------------------------------------|-----------|------------------------|------------------------|
| C21-C21-C21-C22      | 0.1497                                        | 3.0000    | 180.0000               | 1.0000                 |
| C21-C21-C21-C31      | 0.0813                                        | 3.0000    | 180.0000               | 1.0000                 |
| C21-C21-C21-H21      | 0.1950                                        | 3.0000    | 0.0000                 | 1.0000                 |
| C21-C21-C22-C23      | 0.1497                                        | 3.0000    | 180.0000               | 1.0000                 |
| C21-C21-C22-H21      | 0.1950                                        | 3.0000    | 0.0000                 | 1.0000                 |
| C21-C21-C31-H31      | 0.1600                                        | 3.0000    | 0.0000                 | 1.0000                 |
| C21-C22-C23-C11      | 0.1497                                        | 3.0000    | 180.0000               | 1.0000                 |
| C21-C22-C23-H21      | 0.1950                                        | 3.0000    | 0.0000                 | 1.0000                 |
| C22-C21-C21-H21      | 0.1950                                        | 3.0000    | 0.0000                 | 1.0000                 |
| C31-C21-C21-H21      | 0.1800                                        | 3.0000    | 0.0000                 | 1.0000                 |
| H21-C21-C21-H21      | 0.2200                                        | 3.0000    | 0.0000                 | 1.0000                 |
| H21-C21-C22-C23      | 0.1950                                        | 3.0000    | 0.0000                 | 1.0000                 |
| H21-C21-C22-H21      | 0.2200                                        | 3.0000    | 0.0000                 | 1.0000                 |
| H21-C21-C31-H31      | 0.1600                                        | 3.0000    | 0.0000                 | 1.0000                 |
| H21-C22-C23-C11      | 0.1950                                        | 3.0000    | 0.0000                 | 1.0000                 |
| H21-C22-C23-H21      | 0.2200                                        | 3.0000    | 0.0000                 | 1.0000                 |
| O21-C11-C23-C22      | 0.0500                                        | 6.0000    | 180.0000               | 1.0000                 |
| O21-C11-C23-H21      | 0.0500                                        | 6.0000    | 180.0000               | 1.0000                 |

Table S24. Dihedral improper coefficients parameters of the sodium heptanoate (CGENFF).

| Dihedral improper type | $k_{\phi,ijk} \left( \frac{kJ}{mol * \text{\AA}^2} \right)$ | $\phi_{0,ijkl}(\text{\AA}^2)$ |
|------------------------|-------------------------------------------------------------|-------------------------------|
| C23-O21-C11-O21        | 96.0000                                                     | 180.0000                      |

Table S25. Lennard-Jones and partial charge parameters of the hexylamine (CGENFF).

| Atom type | Description | $\epsilon \left( \frac{kJ}{mol * \text{\AA}^2} \right)$ | $\sigma(\text{\AA})$ | $q(e)$  |
|-----------|-------------|---------------------------------------------------------|----------------------|---------|
| C21       |             | 5.6000e-02                                              | 3.5814               | -0.1800 |
| C22       |             | 5.6000e-02                                              | 3.5814               | -0.1850 |
| C23       |             | 5.6000e-02                                              | 3.5814               | 0.0080  |
| C31       |             | 7.8000e-02                                              | 3.6527               | -0.2700 |
| H11       |             | 1.0000e-02                                              | 1.5591               | 0.2960  |
| H21       |             | 3.5000e-02                                              | 2.3876               | 0.0900  |
| H31       |             | 2.4000e-02                                              | 2.3876               | 0.0900  |
| N11       |             | 6.0000e-02                                              | 3.5458               | -0.7750 |

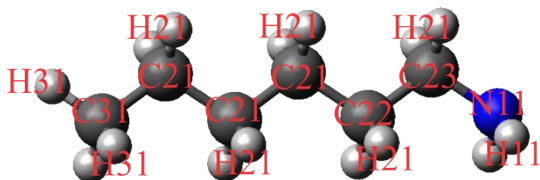

Table S26. Bond parameters of the hexylamine (CGENFF).

| Bond type | $k_{r,ij} \left( \frac{kJ}{mol * \text{\AA}^2} \right)$ | $r_{0,ij}(\text{\AA})$ |
|-----------|---------------------------------------------------------|------------------------|
| C21-C21   | 222.5000                                                | 1.5300                 |
| C21-C22   | 222.5000                                                | 1.5300                 |
| C21-C31   | 222.5000                                                | 1.5280                 |
| C21-H21   | 309.0000                                                | 1.1110                 |
| C22-C23   | 222.5000                                                | 1.5300                 |
| C22-H21   | 309.0000                                                | 1.1110                 |
| C23-H21   | 309.0000                                                | 1.1110                 |
| C23-N11   | 263.0000                                                | 1.4740                 |
| C31-H31   | 322.0000                                                | 1.1110                 |
| H11-N11   | 453.1000                                                | 1.0140                 |

Table S27. Angle parameters of the hexylamine (CGENFF).

| Angle type  | $k_{\theta,ijk} \left( \frac{kJ}{mol * rad^2} \right)$ | $\theta_{0,ijk}(deg)$ | $k_{UB,ik} \left( \frac{kJ}{mol * \text{\AA}^2} \right)$ | $r_{0,ik}(\text{\AA})$ |
|-------------|--------------------------------------------------------|-----------------------|----------------------------------------------------------|------------------------|
| C21-C21-C21 | 58.3500                                                | 113.6000              | 11.1600                                                  | 2.5610                 |
| C21-C21-C22 | 58.3500                                                | 113.6000              | 11.1600                                                  | 2.5610                 |
| C21-C21-C31 | 58.0000                                                | 115.0000              | 8.0000                                                   | 2.5610                 |
| C21-C21-H21 | 26.5000                                                | 110.1000              | 22.5300                                                  | 2.1790                 |
| C21-C22-C23 | 58.3500                                                | 113.6000              | 11.1600                                                  | 2.5610                 |
| C21-C22-H21 | 26.5000                                                | 110.1000              | 22.5300                                                  | 2.1790                 |
| C21-C31-H31 | 34.6000                                                | 110.1000              | 22.5300                                                  | 2.1790                 |
| C22-C21-H21 | 26.5000                                                | 110.1000              | 22.5300                                                  | 2.1790                 |
| C22-C23-H21 | 26.5000                                                | 110.1000              | 22.5300                                                  | 2.1790                 |
| C22-C23-N11 | 43.7000                                                | 112.2000              | 0.0000                                                   | 0.0000                 |
| C23-C22-H21 | 26.5000                                                | 110.1000              | 22.5300                                                  | 2.1790                 |
| C23-N11-H11 | 41.0000                                                | 112.1000              | 0.0000                                                   | 0.0000                 |
| C31-C21-H21 | 34.6000                                                | 110.1000              | 22.5300                                                  | 2.1790                 |

|             |         |          |         |        |
|-------------|---------|----------|---------|--------|
| H11-N11-H11 | 42.0000 | 105.8500 | 0.0000  | 0.0000 |
| H21-C21-H21 | 35.5000 | 109.0000 | 5.4000  | 1.8020 |
| H21-C22-H21 | 35.5000 | 109.0000 | 5.4000  | 1.8020 |
| H21-C23-H21 | 35.5000 | 109.0000 | 5.4000  | 1.8020 |
| H21-C23-N11 | 32.4000 | 109.5000 | 50.0000 | 2.1400 |
| H31-C31-H31 | 35.5000 | 108.4000 | 5.4000  | 1.8020 |

Table S28. Dihedral proper parameters of the hexylamine (CGENFF).

| Dihedral proper type | $k_{\varphi,ijkl} \left( \frac{kJ}{mol} \right)$ | $n(adi.)$ | $\delta_{0,ijkl}(deg)$ | <i>Factorweight</i><br>(adi.) |
|----------------------|--------------------------------------------------|-----------|------------------------|-------------------------------|
| C21-C21-C21-C22      | 0.1497                                           | 3.0000    | 180.0000               | 1.0000                        |
| C21-C21-C21-C31      | 0.0813                                           | 3.0000    | 180.0000               | 1.0000                        |
| C21-C21-C21-H21      | 0.1950                                           | 3.0000    | 0.0000                 | 1.0000                        |
| C21-C21-C22-C23      | 0.1497                                           | 3.0000    | 180.0000               | 1.0000                        |
| C21-C21-C22-H21      | 0.1950                                           | 3.0000    | 0.0000                 | 1.0000                        |
| C21-C21-C31-H31      | 0.1600                                           | 3.0000    | 0.0000                 | 1.0000                        |
| C21-C22-C23-H21      | 0.1950                                           | 3.0000    | 0.0000                 | 1.0000                        |
| C21-C22-C23-N11      | 0.3900                                           | 2.0000    | 0.0000                 | 1.0000                        |
| C22-C21-C21-H21      | 0.1950                                           | 3.0000    | 0.0000                 | 1.0000                        |
| C22-C23-N11-H11      | 0.1000                                           | 3.0000    | 0.0000                 | 1.0000                        |
| C31-C21-C21-H21      | 0.1800                                           | 3.0000    | 0.0000                 | 1.0000                        |
| H21-C21-C21-H21      | 0.2200                                           | 3.0000    | 0.0000                 | 1.0000                        |
| H21-C21-C22-C23      | 0.1950                                           | 3.0000    | 0.0000                 | 1.0000                        |
| H21-C21-C22-H21      | 0.2200                                           | 3.0000    | 0.0000                 | 1.0000                        |
| H21-C21-C31-H31      | 0.1600                                           | 3.0000    | 0.0000                 | 1.0000                        |
| H21-C22-C23-H21      | 0.2200                                           | 3.0000    | 0.0000                 | 1.0000                        |
| H21-C22-C23-N11      | 0.1600                                           | 3.0000    | 0.0000                 | 1.0000                        |
| H21-C23-N11-H11      | 0.0100                                           | 3.0000    | 0.0000                 | 1.0000                        |



Table S29. Lennard-Jones and partial charge parameters of the chlorine hexylammonium (CGENFF).

| Atom type | Description                                                                       | $\epsilon \left( \frac{kJ}{mol * \text{\AA}^2} \right)$ | $\sigma (\text{\AA})$ | $q(e)$  |
|-----------|-----------------------------------------------------------------------------------|---------------------------------------------------------|-----------------------|---------|
| C21       |                                                                                   | 5.6000e-02                                              | 3.5814                | -0.1800 |
| C22       |                                                                                   | 5.6000e-02                                              | 3.5814                | -0.1810 |
| C23       |                                                                                   | 5.6000e-02                                              | 3.5814                | -0.1390 |
| C24       |                                                                                   | 5.6000e-02                                              | 3.5814                | -0.2140 |
| C25       | 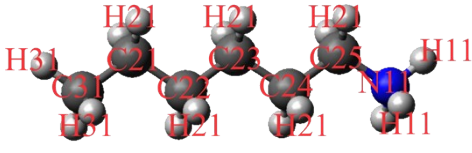 | 5.5000e-02                                              | 3.8754                | 0.1250  |
| C31       |                                                                                   | 7.8000e-02                                              | 3.6527                | -0.2700 |
| H11       |                                                                                   | 4.6000e-02                                              | 0.4000                | 0.3300  |
| H21       |  | 3.5000e-02                                              | 2.3876                | 0.0900  |
| H31       |                                                                                   | 2.4000e-02                                              | 2.3876                | 0.0900  |
| N1        |                                                                                   | 2.0000e-01                                              | 3.2963                | -0.3010 |
| Cl        |                                                                                   | 1.5000e-01                                              | 4.0445                | -1.0000 |

Table S30. Bond parameters of the chlorine hexylammonium (CGENFF).

| Bond type | $k_{r,ij} \left( \frac{kJ}{mol * \text{\AA}^2} \right)$ | $r_{0,ij} (\text{\AA})$ |
|-----------|---------------------------------------------------------|-------------------------|
| C21-C22   | 222.5000                                                | 1.5300                  |
| C21-C31   | 222.5000                                                | 1.5280                  |
| C21-H21   | 309.0000                                                | 1.1110                  |
| C22-C23   | 222.5000                                                | 1.5300                  |
| C22-H21   | 309.0000                                                | 1.1110                  |
| C23-C24   | 222.5000                                                | 1.5300                  |
| C23-H21   | 309.0000                                                | 1.1110                  |
| C24-C25   | 222.5000                                                | 1.5300                  |
| C24-H21   | 309.0000                                                | 1.1110                  |
| C25-H21   | 284.5000                                                | 1.1000                  |
| C25-N1    | 200.0000                                                | 1.4900                  |
| C31-H31   | 322.0000                                                | 1.1110                  |
| H11-N1    | 403.0000                                                | 1.0400                  |

Table S31. Angle parameters of the chlorine hexylammonium (CGENFF).

| Angle type  | $k_{\theta,ijk} \left( \frac{kJ}{mol * rad^2} \right)$ | $\theta_{0,ijk} (deg)$ | $k_{UB,ik} \left( \frac{kJ}{mol * \text{\AA}^2} \right)$ | $r_{0,ik} (\text{\AA})$ |
|-------------|--------------------------------------------------------|------------------------|----------------------------------------------------------|-------------------------|
| C21-C22-C23 | 58.3500                                                | 113.6000               | 11.1600                                                  | 2.5610                  |
| C21-C22-H21 | 26.5000                                                | 110.1000               | 22.5300                                                  | 2.1790                  |
| C21-C31-H31 | 34.6000                                                | 110.1000               | 22.5300                                                  | 2.1790                  |
| C22-C21-C31 | 58.0000                                                | 115.0000               | 8.0000                                                   | 2.5610                  |
| C22-C21-H21 | 26.5000                                                | 110.1000               | 22.5300                                                  | 2.1790                  |
| C22-C23-C24 | 58.3500                                                | 113.6000               | 11.1600                                                  | 2.5610                  |
| C22-C23-H21 | 26.5000                                                | 110.1000               | 22.5300                                                  | 2.1790                  |

|             |         |          |         |        |
|-------------|---------|----------|---------|--------|
| C23-C22-H21 | 26.5000 | 110.1000 | 22.5300 | 2.1790 |
| C23-C24-C25 | 58.3500 | 110.5000 | 11.1600 | 2.5610 |
| C23-C24-H21 | 26.5000 | 110.1000 | 22.5300 | 2.1790 |
| C24-C23-H21 | 26.5000 | 110.1000 | 22.5300 | 2.1790 |
| C24-C25-H21 | 26.5000 | 111.8000 | 22.5300 | 2.1790 |
| C24-C25-N1  | 67.7000 | 110.0000 | 0.0000  | 0.0000 |
| C25-C24-H21 | 26.5000 | 110.1000 | 22.5300 | 2.1790 |
| C25-N1-H11  | 30.0000 | 109.5000 | 20.0000 | 2.0740 |
| C31-C21-H21 | 34.6000 | 110.1000 | 22.5300 | 2.1790 |
| H11-N1-H11  | 44.0000 | 109.5000 | 0.0000  | 0.0000 |
| H21-C21-H21 | 35.5000 | 109.0000 | 5.4000  | 1.8020 |
| H21-C22-H21 | 35.5000 | 109.0000 | 5.4000  | 1.8020 |
| H21-C23-H21 | 35.5000 | 109.0000 | 5.4000  | 1.8020 |
| H21-C24-H21 | 35.5000 | 109.0000 | 5.4000  | 1.8020 |
| H21-C25-H21 | 35.5000 | 109.0000 | 5.4000  | 1.8020 |
| H21-C25-N1  | 45.0000 | 107.5000 | 35.0000 | 2.1010 |
| H31-C31-H31 | 35.5000 | 108.4000 | 5.4000  | 1.8020 |

Table S32. Dihedral proper parameters of the chlorine hexylammonium (CGENFF).

| Dihedral proper type | $k_{\phi,ijkl} \left( \frac{kJ}{mol} \right)$ | $n(adi.)$ | $\delta_{0,ijkl}(deg)$ | Factorweight<br>(adi.) |
|----------------------|-----------------------------------------------|-----------|------------------------|------------------------|
| C21-C22-C23-C24      | 0.1497                                        | 3.0000    | 180.0000               | 1.0000                 |
| C21-C22-C23-H21      | 0.1950                                        | 3.0000    | 0.0000                 | 1.0000                 |
| C22-C21-C31-H31      | 0.1600                                        | 3.0000    | 0.0000                 | 1.0000                 |
| C22-C23-C24-C25      | 0.1950                                        | 3.0000    | 0.0000                 | 1.0000                 |
| C22-C23-C24-H21      | 0.1950                                        | 3.0000    | 0.0000                 | 1.0000                 |
| C23-C24-C25-H21      | 0.1950                                        | 3.0000    | 0.0000                 | 1.0000                 |
| C23-C24-C25-N1       | 0.1950                                        | 3.0000    | 0.0000                 | 1.0000                 |
| C24-C25-N1-H11       | 0.1000                                        | 3.0000    | 0.0000                 | 1.0000                 |
| C31-C21-C22-C23      | 0.0813                                        | 3.0000    | 180.0000               | 1.0000                 |
| C31-C21-C22-H21      | 0.1800                                        | 3.0000    | 0.0000                 | 1.0000                 |
| H21-C21-C22-C23      | 0.1950                                        | 3.0000    | 0.0000                 | 1.0000                 |
| H21-C21-C22-H21      | 0.2200                                        | 3.0000    | 0.0000                 | 1.0000                 |
| H21-C21-C31-H31      | 0.1600                                        | 3.0000    | 0.0000                 | 1.0000                 |
| H21-C22-C23-C24      | 0.1950                                        | 3.0000    | 0.0000                 | 1.0000                 |
| H21-C22-C23-H21      | 0.2200                                        | 3.0000    | 0.0000                 | 1.0000                 |
| H21-C23-C24-C25      | 0.1950                                        | 3.0000    | 0.0000                 | 1.0000                 |
| H21-C23-C24-H21      | 0.2200                                        | 3.0000    | 0.0000                 | 1.0000                 |
| H21-C24-C25-H21      | 0.1950                                        | 3.0000    | 0.0000                 | 1.0000                 |
| H21-C24-C25-N1       | 0.1950                                        | 3.0000    | 0.0000                 | 1.0000                 |
| H21-C25-N1-H11       | 0.1000                                        | 3.0000    | 0.0000                 | 1.0000                 |

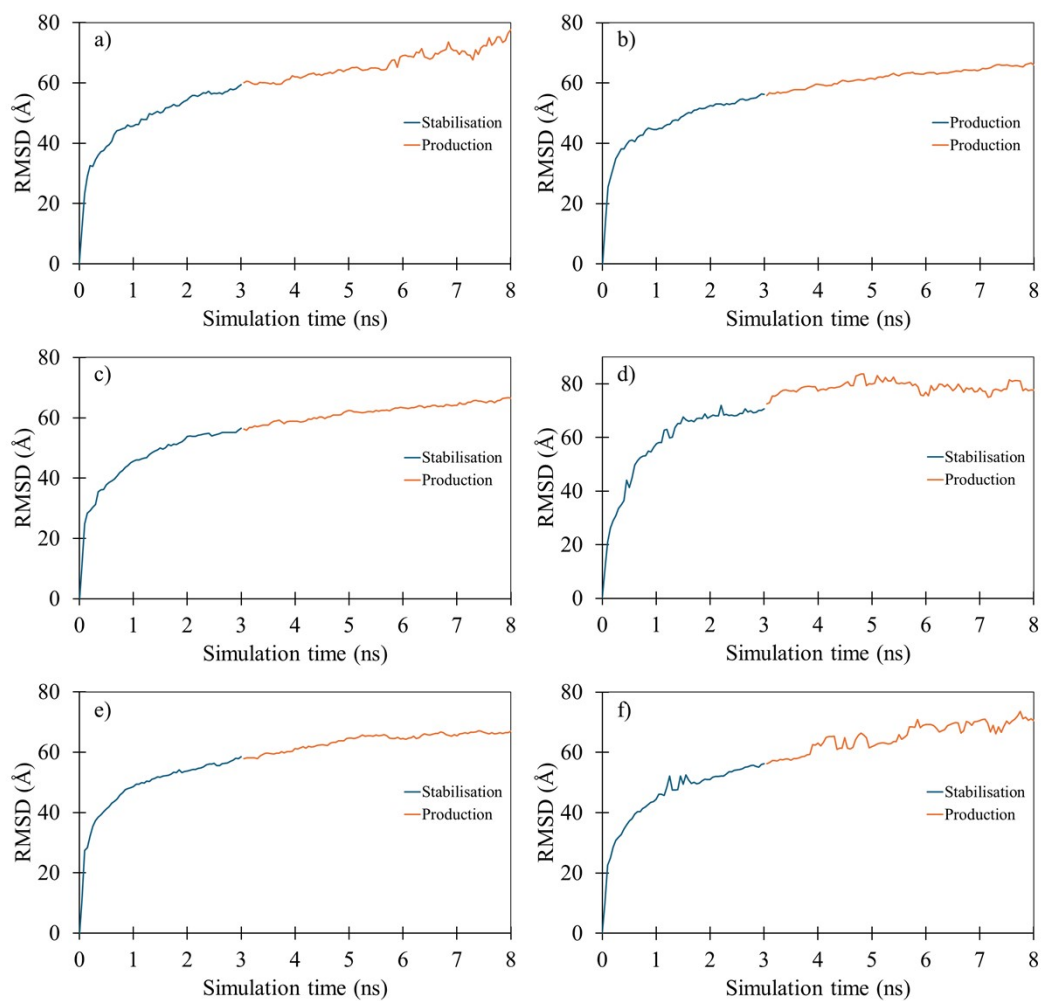

Figure S1. Mean-squared displacement (MSD) for direct emulsions on the basal surface of illite. a) the aromatic crude oil model in water system. b) the aliphatic crude oil model in water system. c) the polar A crude oil model in water at  $\text{pH} \ll 4.4$  system. d) the polar A crude oil model in water at  $\text{pH} \gg 4.4$  system. e) the polar B crude oil model in water at  $\text{pH} \gg 10.64$  system. f) the polar B crude oil model in water at  $\text{pH} \ll 10.64$  system.

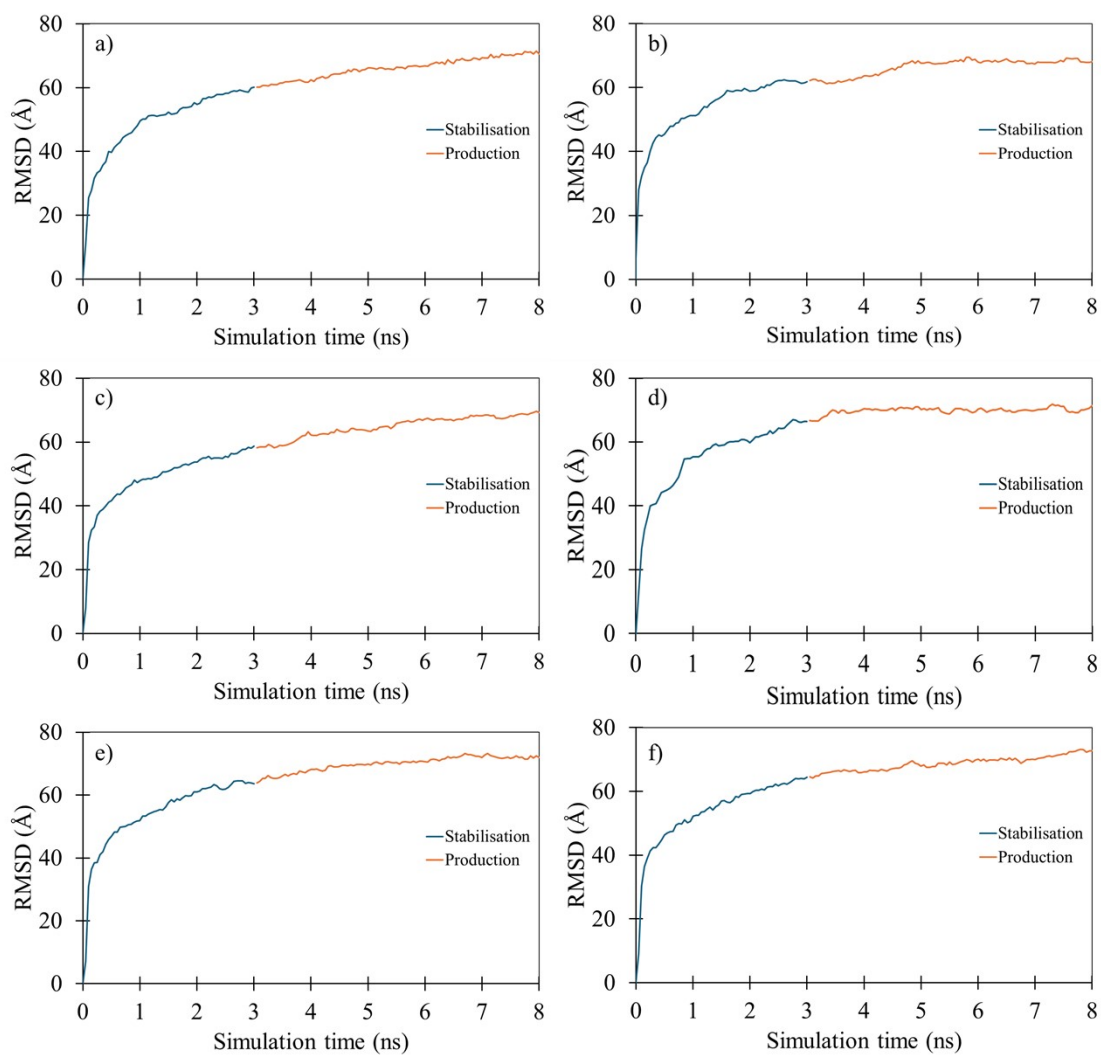

Figure S2. Mean-squared displacement (MSD) for indirect emulsions on the basal surface of illite. a) Water in the aromatic crude oil model system. b) Water in the aliphatic crude oil model in water system. c) Water at  $\text{pH} \ll 4.4$  in the polar A crude oil model. d) Water at  $\text{pH} \gg 10.64$  in the polar A crude oil model system. e) Water at  $\text{pH} \ll 10.64$  in the polar B crude oil model system.

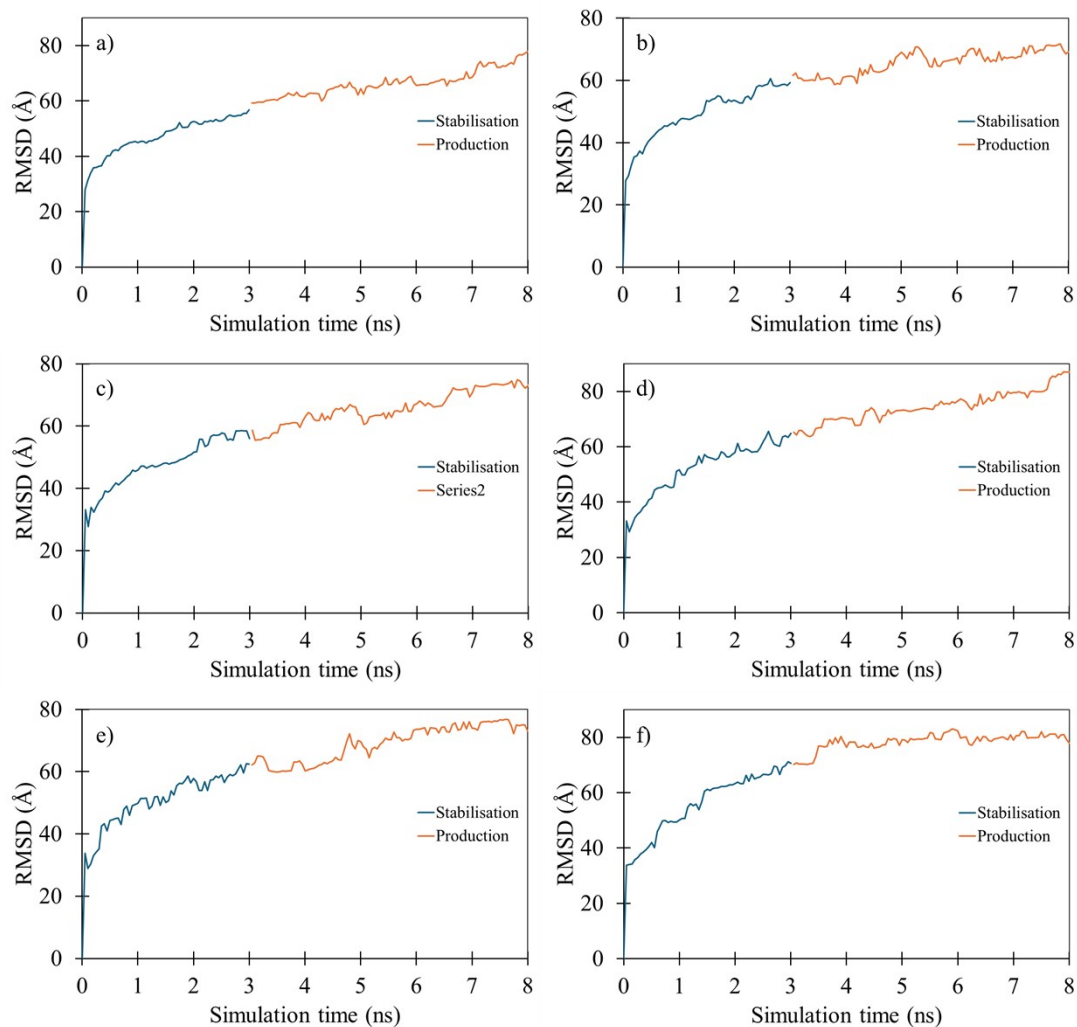

Figure S3. Mean-squared displacement (MSD) for direct emulsions on the edge surface of illite. a) the aromatic crude oil model in water system. b) the aliphatic crude oil model in water system. c) the polar A crude oil model in water at  $\text{pH} \ll 4.4$  system. d) the polar A crude oil model in water at  $\text{pH} \gg 4.4$  system. e) the polar B crude oil model in water at  $\text{pH} \gg 10.64$  system. f) the polar B crude oil model in water at  $\text{pH} \ll 10.64$  system.

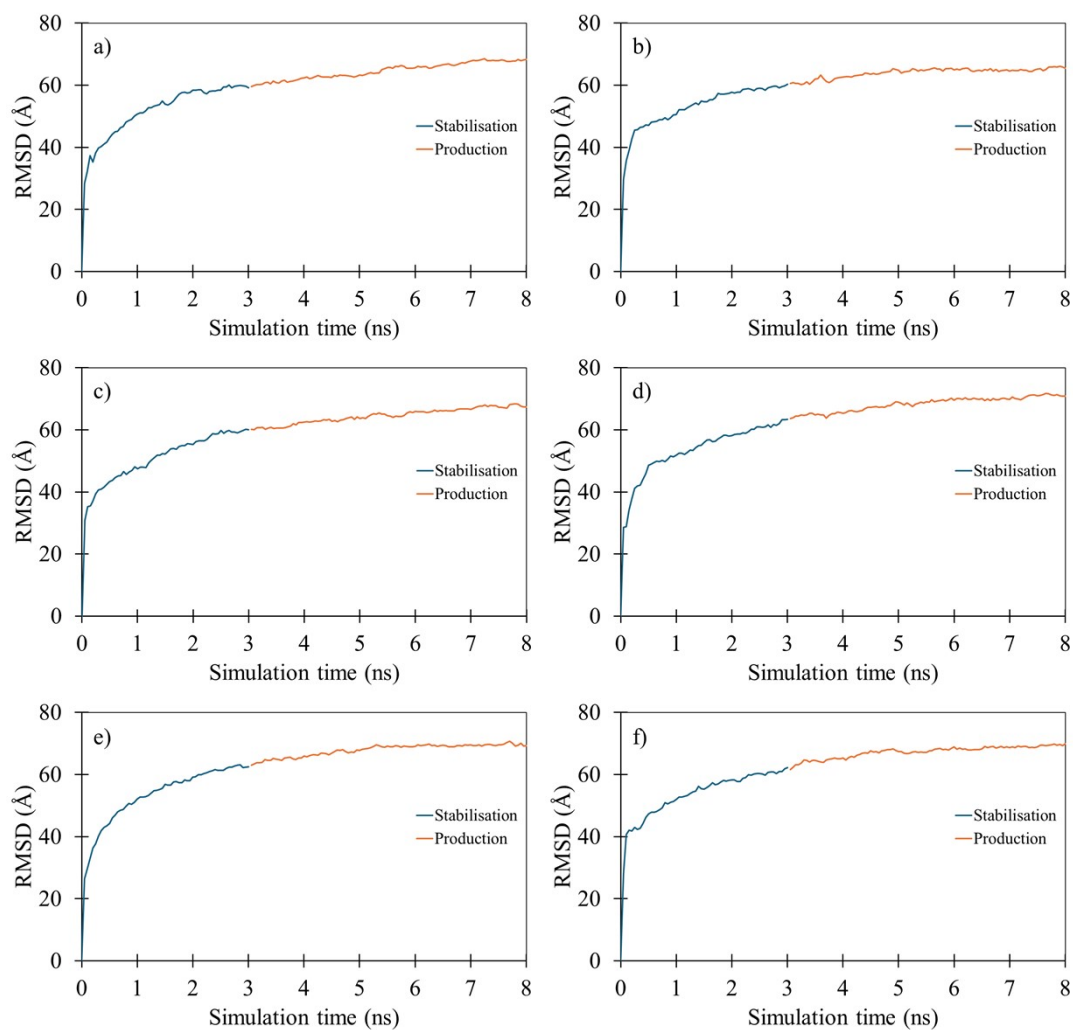

Figure S4. Mean-squared displacement (MSD) for indirect emulsions on the edge surface of illite. a) Water in the aromatic crude oil model system. b) Water in the aliphatic crude oil model in water system. c) Water at  $\text{pH} \ll 4.4$  in the polar A crude oil model. d) Water at  $\text{pH} \gg 10.64$  in the polar A crude oil model system. e) Water at  $\text{pH} \ll 10.64$  in the polar B crude oil model system.

Final configurations and density profiles for each simulation of inverse emulsion on the basal surface (001). Crude oil models are: toluene (aromatic), heptane (aliphatic), heptane – heptanoic acid (polar A), heptane – hexylamine (polar B).

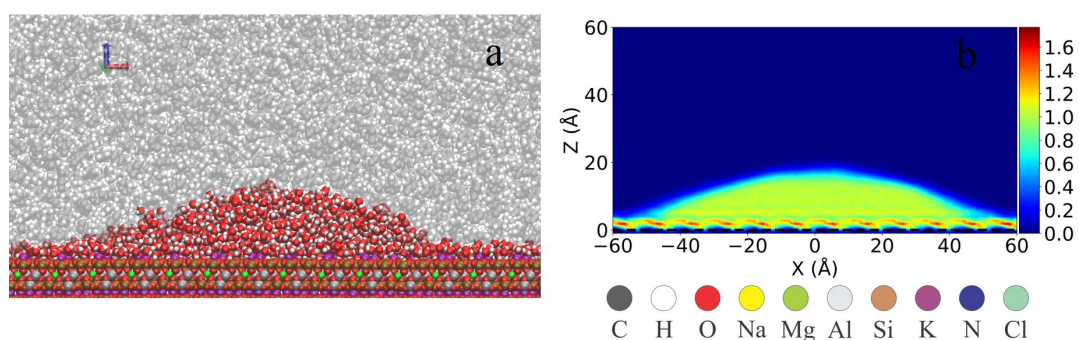

Figure S5. a) Screenshot at 8 ns of the simulation of the water in aromatic crude oil model on the basal surface. b) Corresponding density profile captured at the production stage.

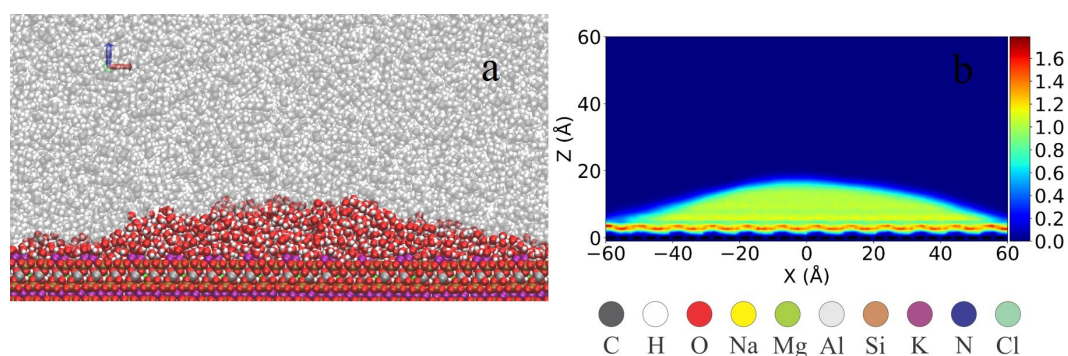

Figure S6. a) Screenshot at 8 ns of the simulation of the water in aliphatic crude oil model on the basal surface. b) Corresponding density profile captured at the production stage.

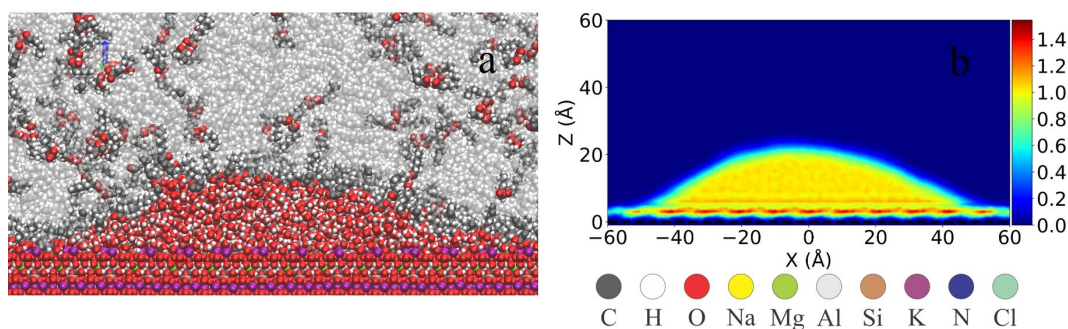

Figure S7. a) Screenshot at 8 ns of the simulation of the water at pH << 4.4 in polar A crude oil model on the basal surface. b) Corresponding density profile captured at the production stage.



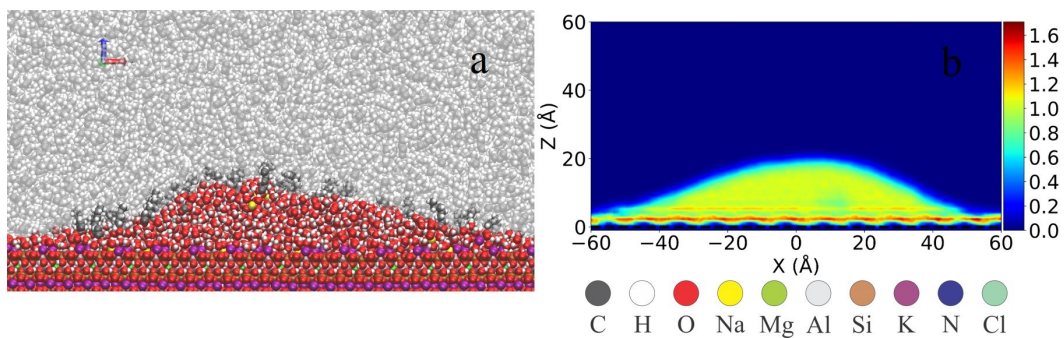

Figure S8. a) Screenshot at 8 ns of the simulation of the water at  $\text{pH} \gg 4.4$  in polar A crude oil model on the basal surface. b) Corresponding density profile captured at the production.

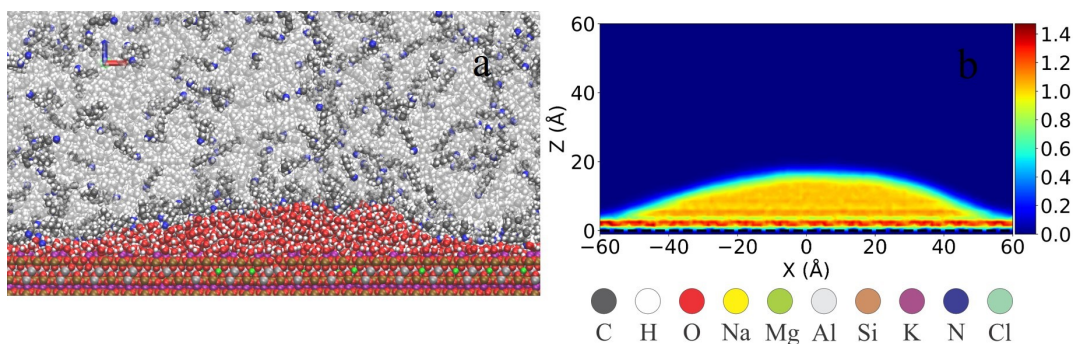

Figure S9. a) Screenshot at 8 ns of the simulation of the water at  $\text{pH} \gg 10.64$  in polar B crude oil model on the basal surface. b) Corresponding density profile captured at the production stage.

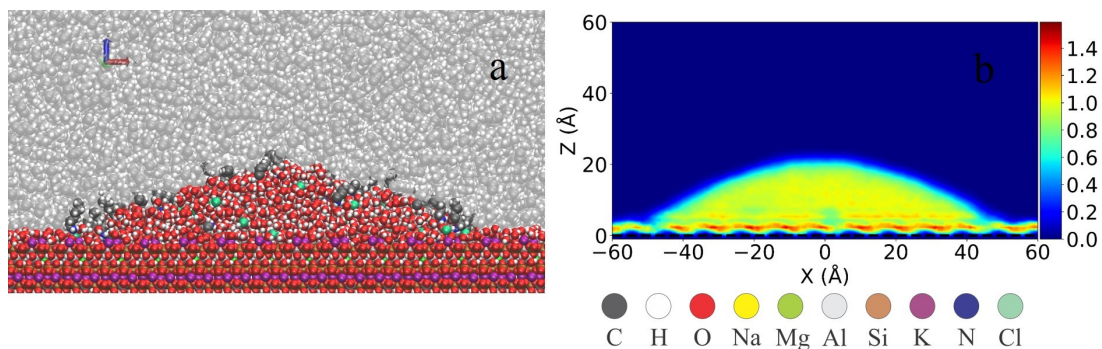

Figure S10. a) Screenshot at 8 ns of the simulation of the water at  $\text{pH} \ll 10.64$  in polar B crude oil model on the basal surface. b) Corresponding density profile captured at the production stage.



Final configurations and density profiles for each simulation of direct emulsions on the basal surface (001). Crude oil models are: toluene (aromatic), heptane (aliphatic), heptane – heptanoic acid (polar A), heptane – hexylamine (polar B).

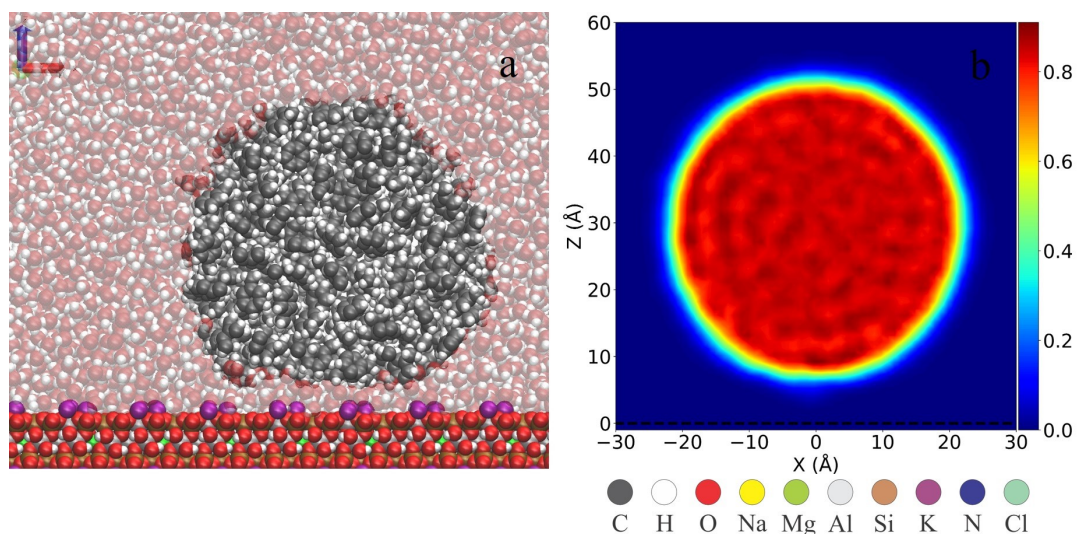

Figure S11. a) Screenshot at 8 ns of the simulation of the aromatic crude oil model in water on the basal surface. b) Corresponding density profile captured at the production stage.

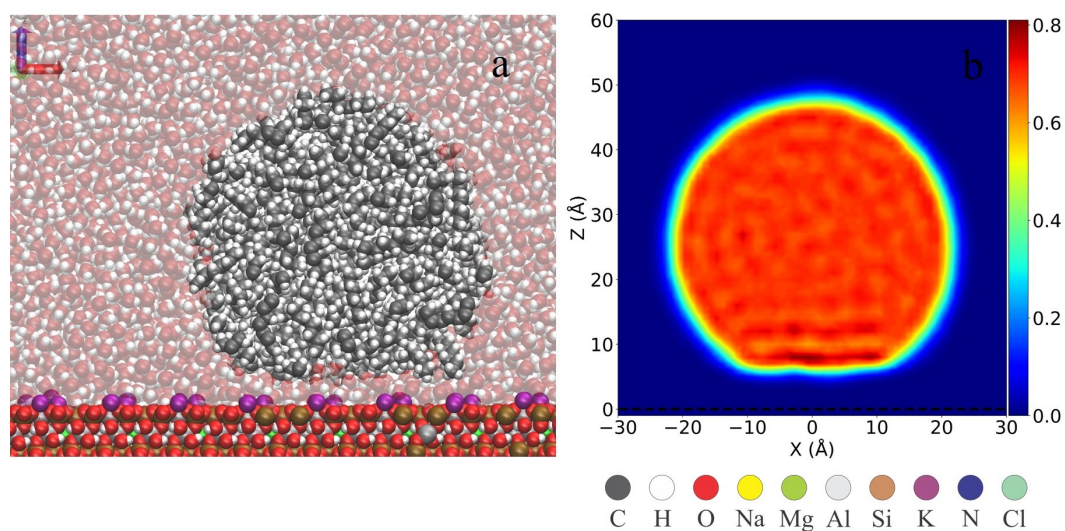

Figure S12. a) Screenshot at 8 ns of the simulation of the aliphatic crude oil model in water on the basal surface. b) Corresponding density profile captured at the production stage.

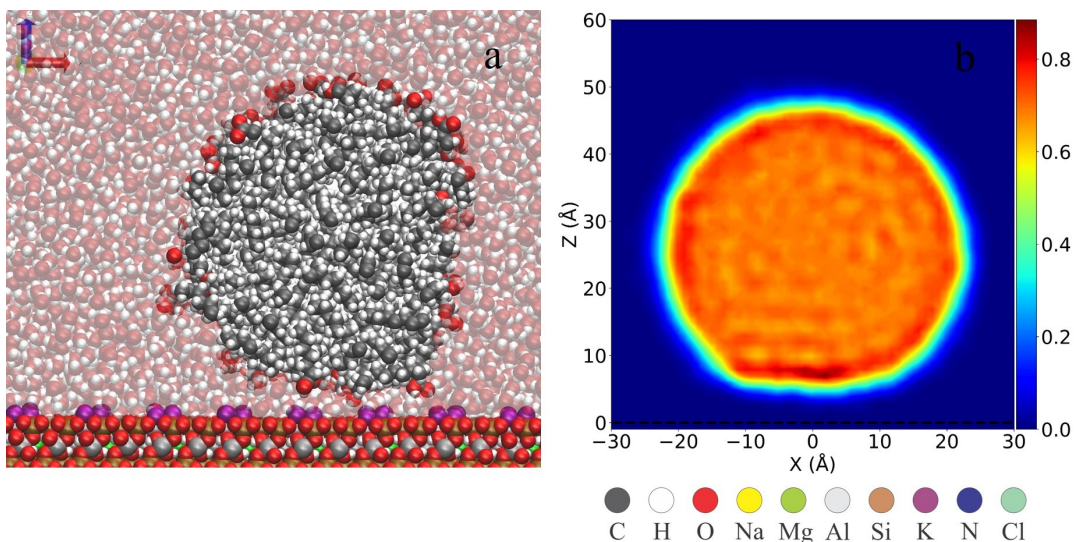

Figure S13. a) Screenshot at 8 ns of the simulation of the polar A crude oil model in water at  $\text{pH} \ll 4.4$  on the basal surface. b) Corresponding density profile captured at the production stage.

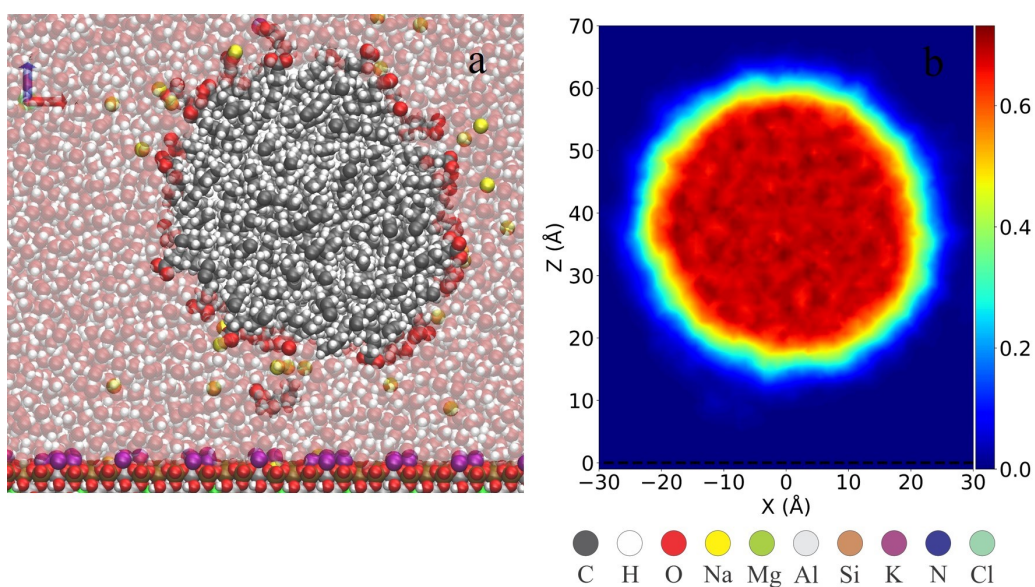

Figure S14. Screenshot at 8 ns of the simulation of the polar A crude oil model in water at  $\text{pH} \gg 4.4$  on the basal surface. b) Corresponding density profile captured at the production stage.

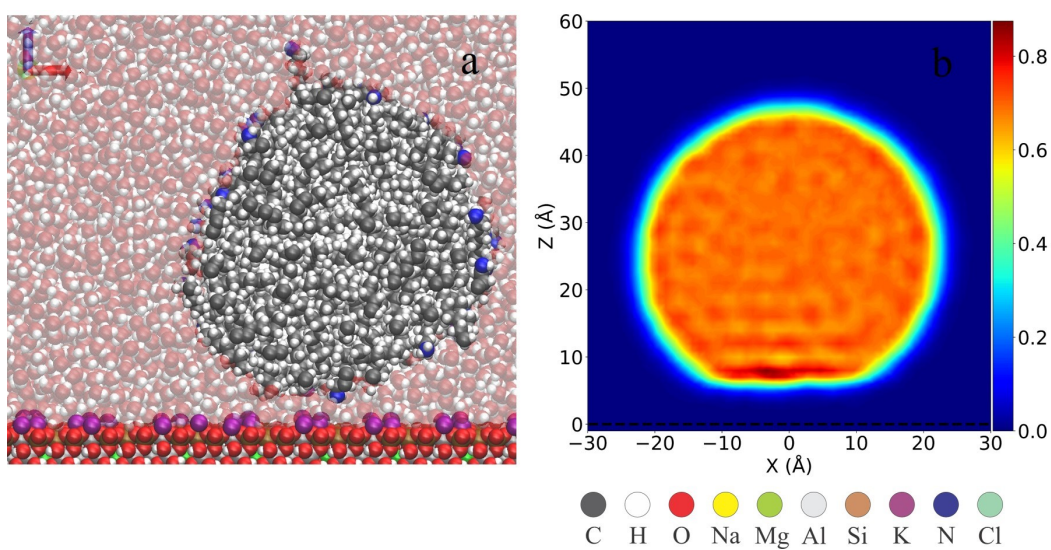



Figure S15. a) Screenshot at 8 ns of the simulation of the polar B crude oil model in water at  $\text{pH} \gg 10.64$  on the basal surface. b) Corresponding density profile captured at the production stage.

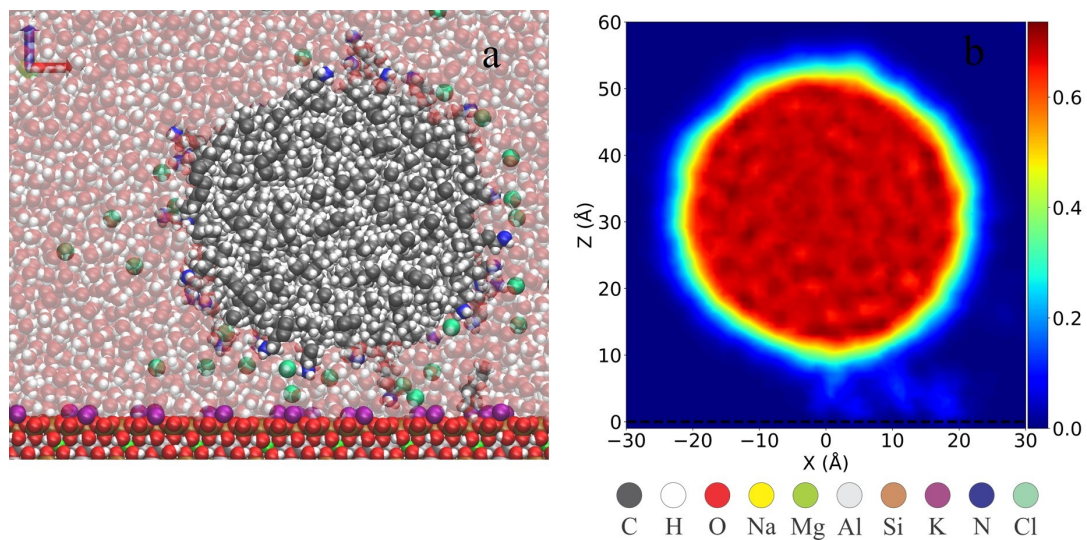

Figure S16. a) Screenshot at 8 ns of the simulation of the polar B crude oil model in water at  $\text{pH} \ll 10.64$  on the basal surface. b) Corresponding density profile captured at the production stage.

Final configurations and density profiles for each simulation of inverse emulsions on the edge surface (010). Crude oil models are: toluene (aromatic), heptane (aliphatic), heptane – heptanoic acid (polar A), heptane – hexylamine (polar B).

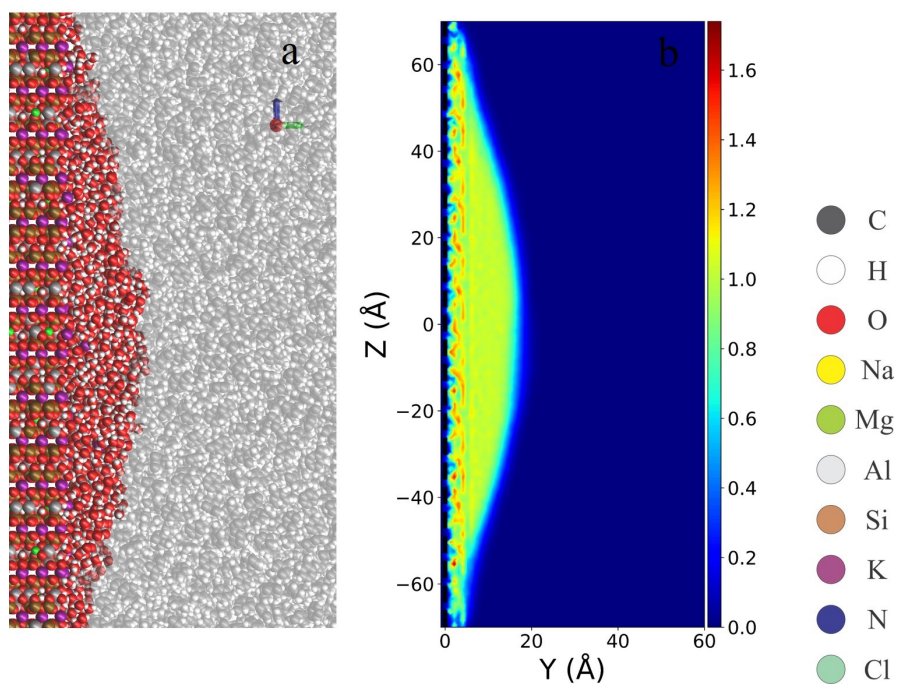

Figure S17. a) Screenshot at 8 ns of the simulation of the water in aromatic crude oil model on the edge surface. b) Corresponding density profile captured at the production stage.

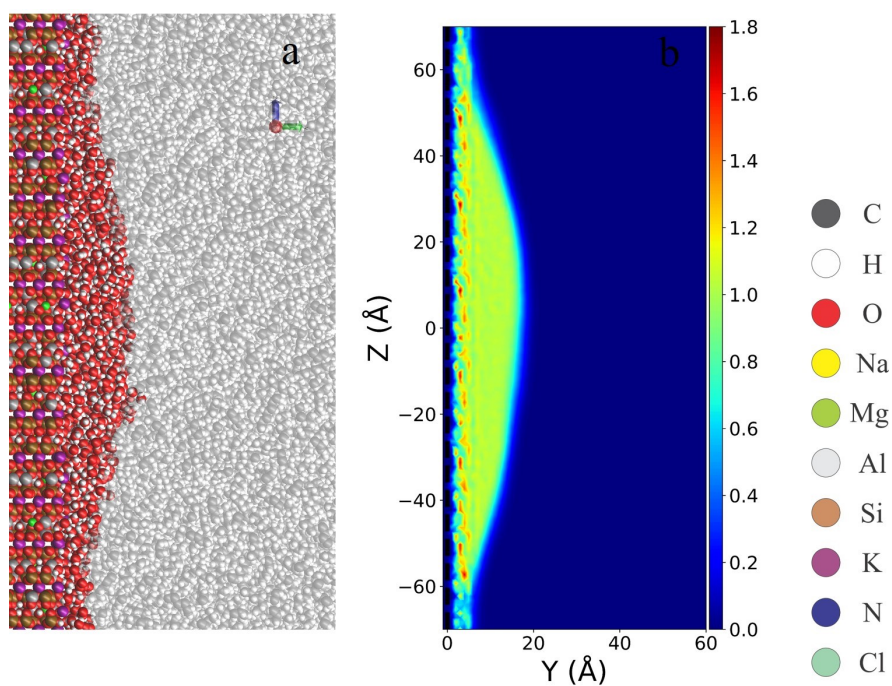

Figure S18. a) Screenshot at 8 ns of the simulation of the water in aliphatic crude oil model on the edge surface. b) Corresponding density profile captured at the production stage.

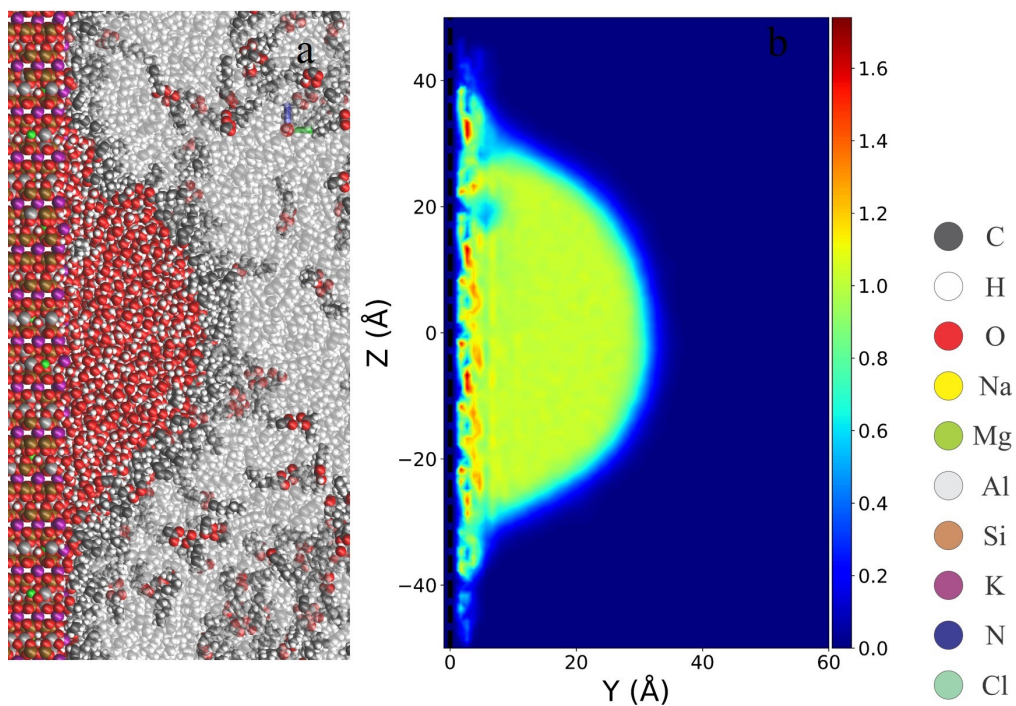

Figure S19. a) Screenshot at 8 ns of the simulation of the water at  $\text{pH} \ll 4.4$  in polar A crude oil model on the edge surface. b) Corresponding density profile captured at the production stage.

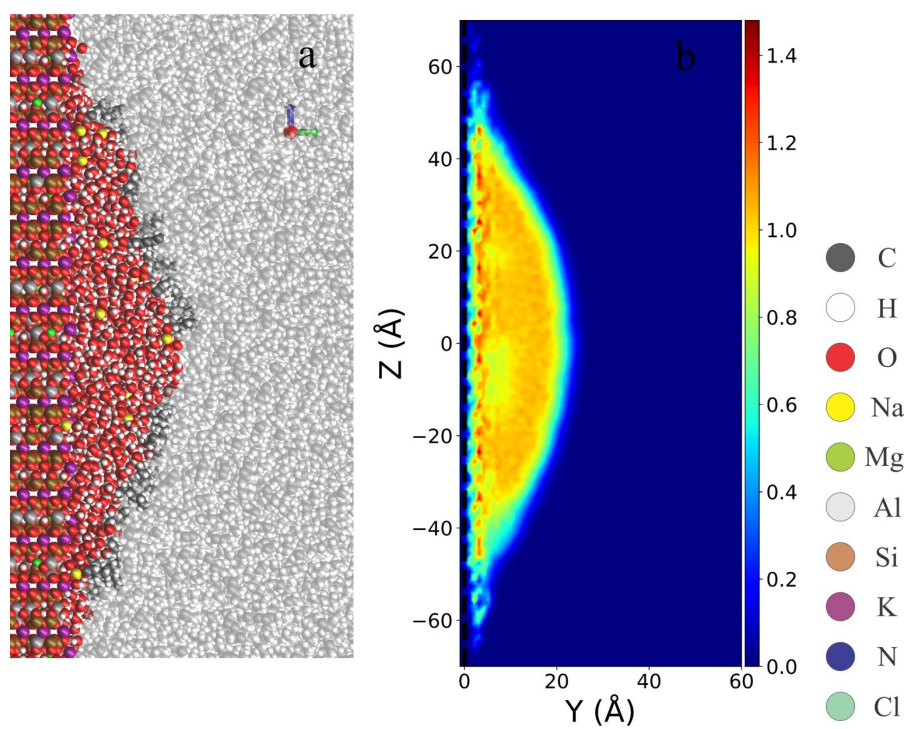

Figure S20. a) Screenshot at 8 ns of the simulation of the water at  $\text{pH} \gg 4.4$  in polar A crude oil model on the edge surface. b) Corresponding density profile captured at the production stage.



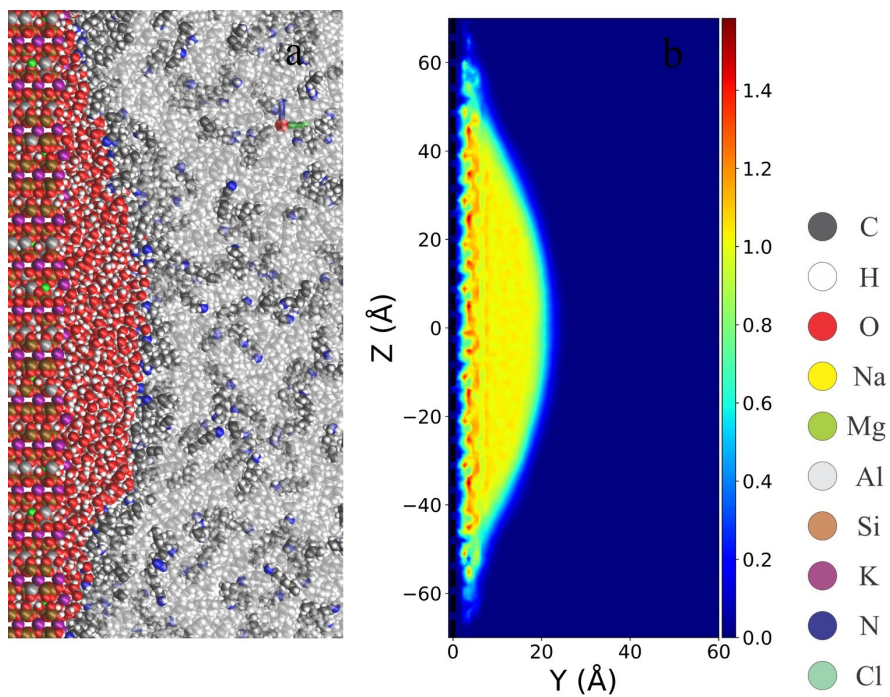

Figure S21. a) Screenshot at 8 ns of the simulation of the water at  $\text{pH} \gg 10.64$  in polar B crude oil model on the edge surface. b) Corresponding density profile captured at the production stage.

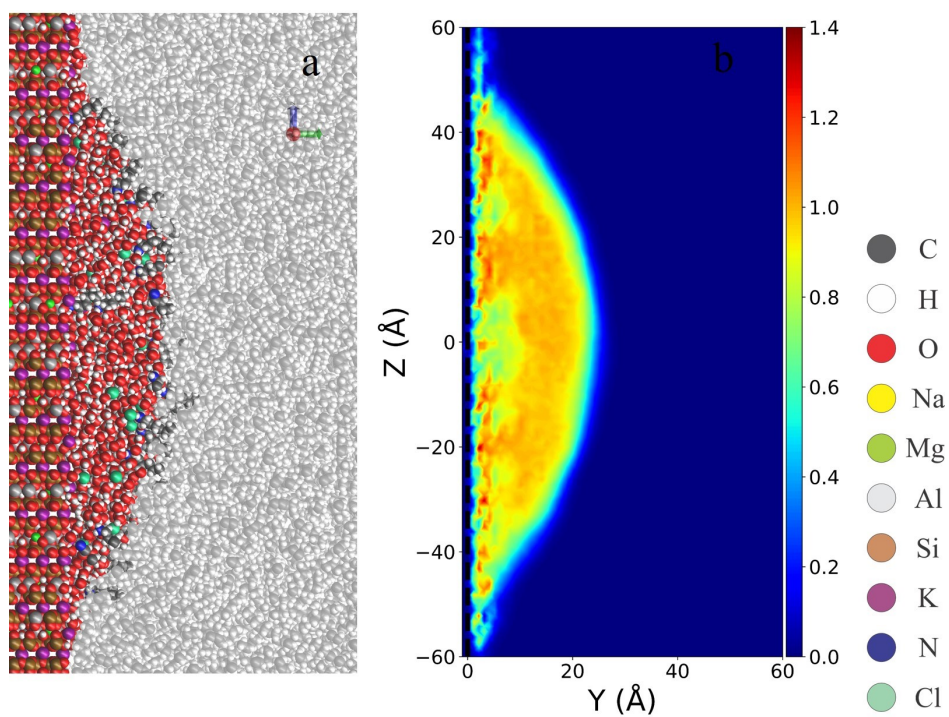

Figure S22. a) Screenshot at 8 ns of the simulation of the water at  $\text{pH} \ll 10.64$  in polar B crude oil model on the edge surface. b) Corresponding density profile captured at the production stage.

Final configurations and density profiles for each simulation of direct emulsions on the edge surface (010). Crude oil models are: toluene (aromatic), heptane (aliphatic), heptane – heptanoic acid (polar A), heptane – hexylamine (polar B).

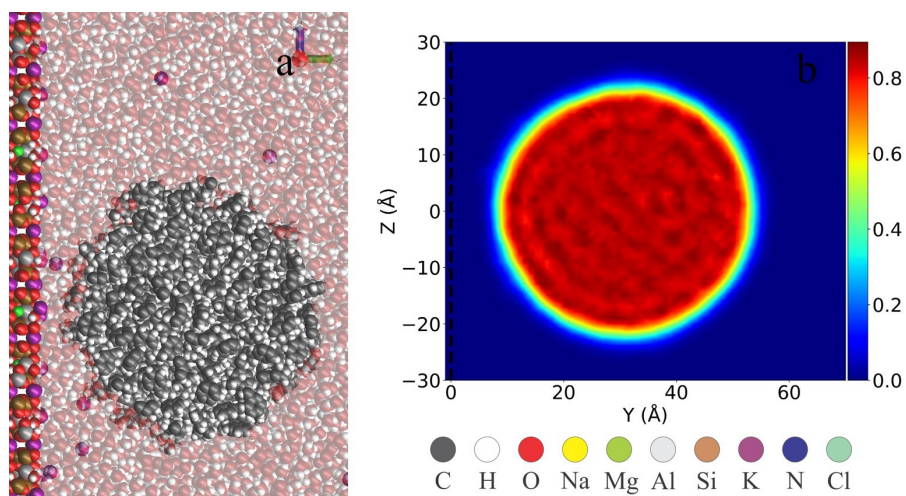

Figure S23. a) Screenshot at 8 ns of the simulation of the aromatic crude oil model in water on the edge surface. b) Corresponding density profile captured at the production stage.

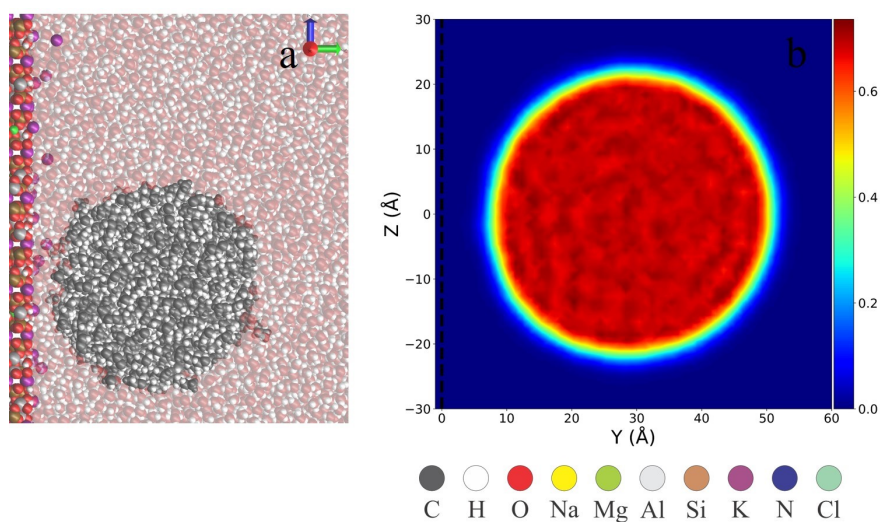

Figure S24. a) Screenshot at 8 ns of the simulation of the aliphatic crude oil model in water on the edge surface. b) Corresponding density profile captured at the production stage.



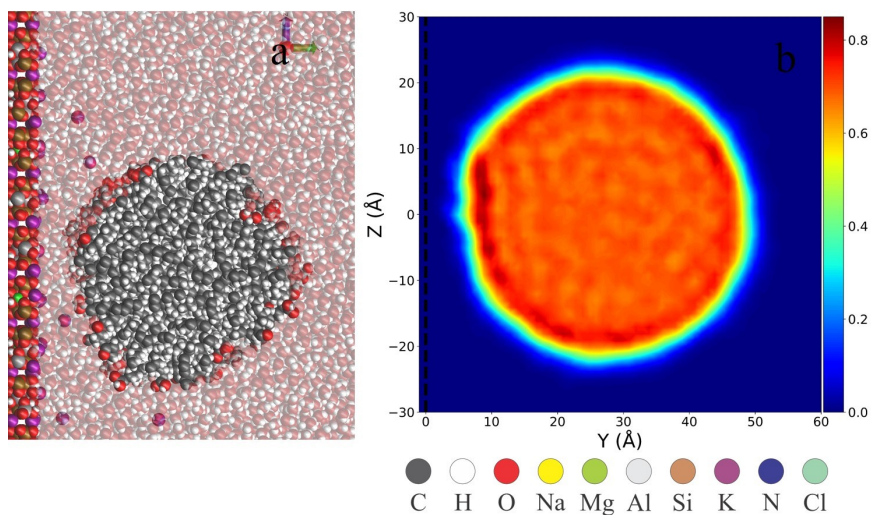

Figure S25. a) Screenshot at 8 ns of the simulation of the polar A crude oil model in water at  $\text{pH} \ll 4.4$  on the edge surface. b) Corresponding density profile captured at the production stage.

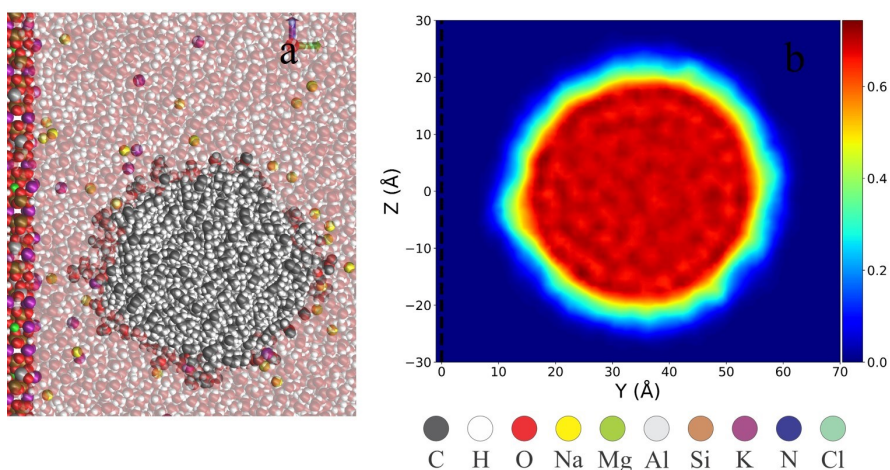

Figure S26. Screenshot at 8 ns of the simulation of the polar A crude oil model in water at  $\text{pH} \gg 4.4$  on the edge surface. b) Corresponding density profile captured at the production stage.

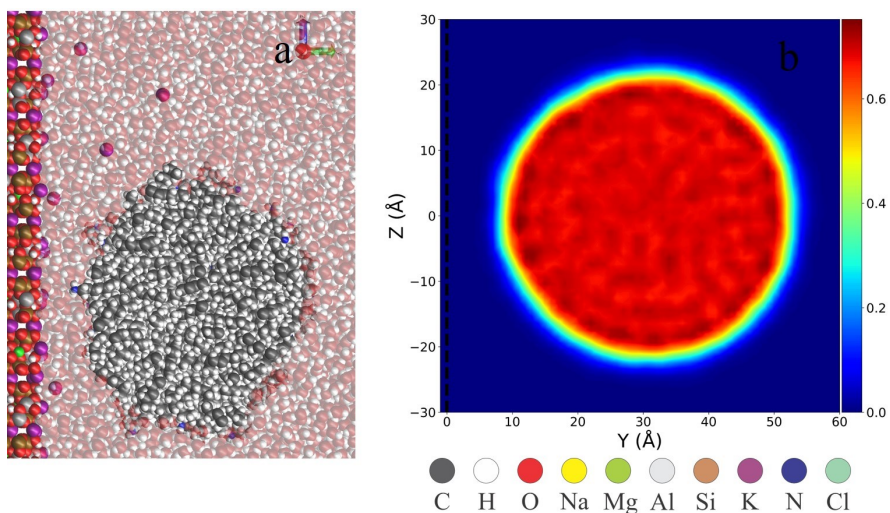

Figure S27. a) Screenshot at 8 ns of the simulation of the polar B crude oil model in water at  $\text{pH} \gg 10.64$  on the edge surface. b) Corresponding density profile captured at the production stage.



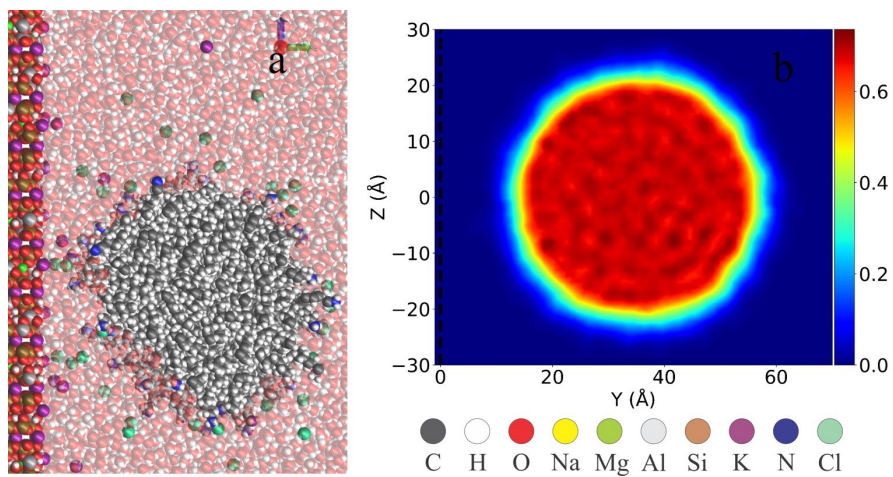

Figure S28. a) Screenshot at 8 ns of the simulation of the polar B crude oil model in water at  $\text{pH} \ll 10.64$  on the edge surface. b) Corresponding density profile captured at the production stage.

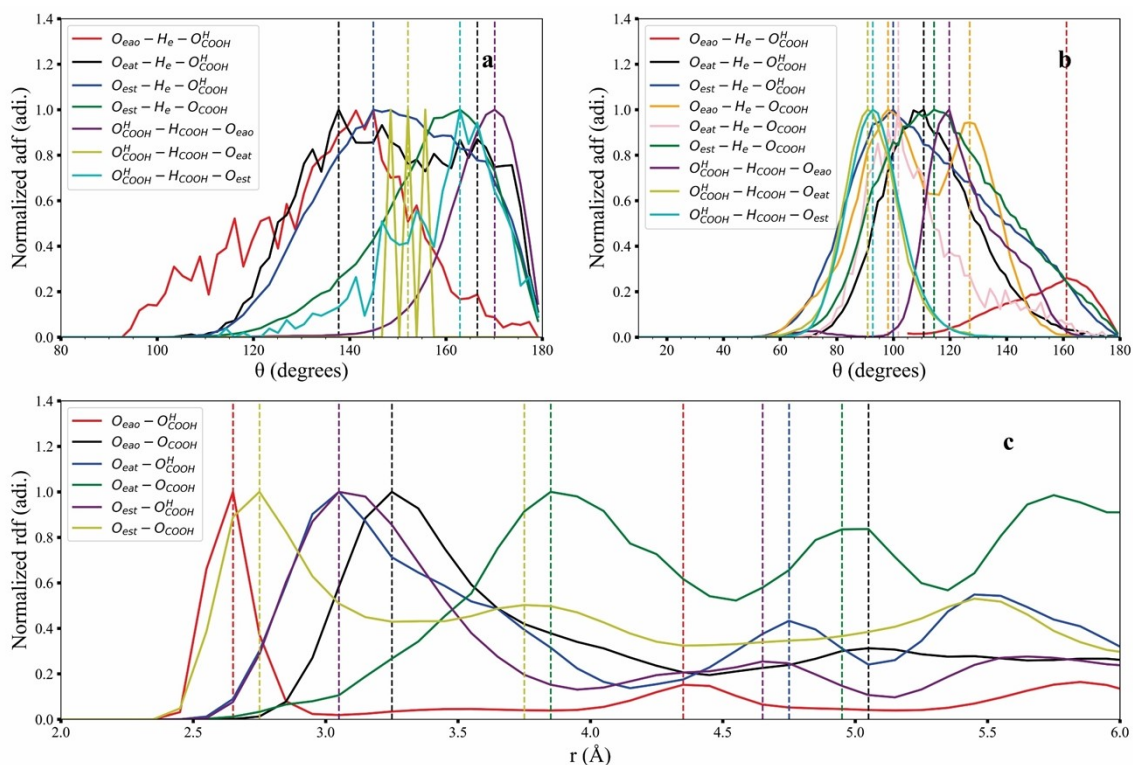

Figure S29. a) adf of the moderate hydrogen-bridging interactions between the hydroxyls of the edge surface (010) and the carboxyl group of heptanoic acid. b) adf of the weak hydrogen-bridging interactions between the hydroxyls of the edge surface (010) and the carboxyl group of heptanoic acid. c) rdf between the oxygens of the hydroxyls of the edge surface and the oxygens of the carboxyl group of heptanoic acid. The vertical lines correspond to the maxima of each curve.  $O_{eao}$ ,  $O_{eat}$  and  $O_{est}$  are the edge hydroxyl oxygens attached to the octahedral aluminum, tetrahedral aluminum, and tetrahedral silicon, respectively, while  $H_e$  is the edge hydroxyl hydrogen.  $O_{COOH}^H$ ,  $O_{COOH}$ , and  $H_{COOH}$  are the hydroxyl oxygen, carbonyl oxygen, and hydroxyl hydrogen of carboxyl functional group, respectively.
